# Supplementary material for: Noise and biases in genomic data may underlie radically different hypotheses for the position of Iguania within Squamata
Source: PLoS One. 2018 Aug 22;13(8):e0202729. doi: 10.1371/journal.pone.0202729 (PMC6105018; doi:10.1371/journal.pone.0202729)
Supplement: S1 File — (NEX) [file pone.0202729.s016.nex]

#NEXUS

BEGIN DATA;
	DIMENSIONS NTAX=46 NCHAR=848;
	FORMAT DATATYPE=standard INTERLEAVE=no MISSING=? SYMBOLS="0 1 2 3 4";
	CHARSTATELABELS
		1 GKMRB_1_Premaxilla_fused/paired fused, 2 GKMRB_2_Premaxilla_palatal_shelf/not bifid_caudally, 3 GKMRB_3_Premaxilla_maxillary_process_size/prominent reduced absent, 4 GKMRB_4_Premaxilla_maxillary_process_length_relative_to_level_of_palatine_maxilla_suture/premaxilla_medial_to_contact premaxilla_lateral_to_contact, 5 NEW_Premaxilla_maxillary_process_shape_Zaher_and_Scanferla/maxillary_process_broad_distally_with_squared_off_margin_in_dorsal_view tapers_to_point_distally, 6 GKMRB_5_Premaxillary_maxillary_fenestra/absent present, 7 GKMRB_6_Premaxilla_body_anterior_ethmoidal_foramina_number/two four_or_more, 8 GKMRB_7_Premaxilla_body_anterior_ethmoidal_foramina_exit_via/external_naris premaxillary_notch premaxillary_body between_pmax_and_max in_maxilla, 9 GKMRB_8a_Premaxilla_body_ventral_ethmoidal_foramen/present absent, 10 GKMRB_8b_Premaxilla_body_ventral_ethmoidal_foramen/small large, 11 GKMRB_9_Premaxilla_maxilla_suture/firm loose, 12 LBG_162_Premaxilla_position_relative_to_maxilla/maxilla_converges_to_lateral_edge_of_premaxilla_in_continuous_line_even_if_not_in_contact_reaching_same_level_anteriorly_as_body_of_premaxilla maxilla_tips_converge_well_caudal_to_premaxilla_body, 13 GKMRB_10_Premaxilla_internasal_process_length/less_than_half_nasal_length more_than_half_nasal_length nearly_to_or_articulates_with_frontal, 14 GKMRB_11_Premaxilla_internasal_process_shape_in_cross_section/subtriangular compressed depressed, 15 GKMRB_12__Premaxilla_internasal_process_position_relative_to_nasal_descending_lamina/at_same_level_as_nasals clasped_between_nasals narrowly_clasped lamina_abuts_base_pmax loss_lamina_pmax_contact, 16 GKMRB_13_Premaxilla_internasal_process_shape_in_anterior_view/tapers_or_parallel_sided widens_across_nares, 17 GKMRB_14_Premaxilla_internasal_process_size/well_developed very_reduced_or_absent, 18 GKMRB_15_Premaxilla_internasal_process_bifid_in_lateral_view_with_ancestral_dorsal_ramus_joined_by_a_deeper_ventral_ramus_premaxillary_keel_of_Lee_and_Scanlon2002_extending_posteriorly_off_base_of_internasal_process/absent present, 19 GKMRB_16_Premaxilla_conspicuous_vertical_margin_on_maxillary_process/absent present, 20 NEW_Premaxilla_alveolar_margin_arched_lingual_arch_for_passage_of_tongue_during_protrusion_with_mouth_closed/absent_alveolar_margin_horizontal_in_anterior_view present_at_least_below_base_of_internasal_ramus_as_ethmoidal_nerve_enters_in_Typhlops_Lepto_Liotyphlops_Calabaria_Eryx_Cylindrophis, 21 GMKRB_17_Nasals_fused/paired fused, 22 GKMRB_18_Nasals_anterior_width_relative_to_nasofrontal_joint_width/exceeds subequal less_than, 23 GKMRB_19_Nasal_prefrontal_suture/present absent, 24 CKMRB_20_Nasal_maxilla_suture/present absent, 25 GKMRB_21_Nasal_descending_lamina_extends_below_level_of_nasal_maxilla_suture/absent present, 26 GKMRB_22_Nasal_supranarial_process_in_dorsal_view/prominent reduced_or_absent, 27 GKMRB_23_Nasal_maxilla_suture_in_cross_section_anteriorly/maxilla_ovelaps_nasal nasal_partly_overlaps_maxilla nasal_abuts_maxilla nasal_underlaps_maxilla_to_floor_of_narial_chamber, 28 GKMRB_24_Nasals_ventral_contact_beneath_premaxillary_internasal_process/broad narrowly_at_apex_only_if_at_all, 29 GKMRB_25_Nasals_dorsal_contact_over_premaxilla_internasal_process/absent at_apex_only broadly_in_contact_dorsally, 30 GKMRB_26_Nasals_reduced_to_narrowly_elliptic_elements_plastered_to_either_side_of_premaxilla_internasal_process/absent present, 31 GKMRB_27_Nasal_shape/not_small_and_cruciform small_and_cruciform, 32 GKMRB_28_Nasal_length_relative_to_frontal_length/nasal_shorter nasals_longer, 33 GKMRB_29_Nasal_anterior_extent_toward_premaxilla/nasal_extends_anterior_to_maxillary_tooth_row_or_vomer nasal_terminates_posterior_to_end_of_maxillary_tooth_row_or_vomer_tip, 34 GKMRB_30_Naso_frontal_fontanelle/absent present, 35 GKMRB_31_Naso_frontal_suture_shape/without_V_shaped_nasal_process_into_frontal_midline with_prominent_V_shaped_nasal_process_into_frontal_midline, 36 GKMRB_32_Nasal_frontal_dorsal_articulation_extent/present_broad_anteroposteriorly present_narrow_anteroposteriorly, 37 NEW_Naso_frontal_joint/absent_or_nasal_descending_laminae_insert_conformably_bewteen_frontal_pillars present_discrete_ventral_pegs_pivot_on_base_of_frontal_pillars, 38 NEW_Nasal_descending_laminae_frontal_pillar_articulation_extent/in_contact_over_at_least_dorsal_half_of_frontal_pillar ventrally_only dorsally_only broadly_separated, 39 GKMRB_35_Nasal_descending_lamina_shape_at_ventral_contact_with_frontal/abutting reduced_to_point_contact, 40 NEW_Nasal_medial_articulation_to_frontal_on_skull_roof/nasal_laps_over_frontal_near_midline frontal_laps_over_nasal_near_midline no_overlap, 41 NEW_Nasal_lateral_articulation_to_frontal/nasal_bevelled_ventrally_over_lateral_frontal_articulation_ nasal_not_bevelled_laterally nasal_broadly_separated_from_frontal_laterally nasal_bevelled_dorsally_at_frontal_overlap, 42 NEW_Nasal_supranarial_excavation_prominent/absent present, 43 36_Frontals_fused/paired fused, 44 GKMRB_37_Frontal_maxilla_suture/frontal_separated_from_maxilla_by_nasal_prefrontal_contact frontal_contacts_maxilla_separating_nasal_from_prefrontal, 45 GKMRB_38_Frontal_subolfactory_processes_development/absent arch_beneath_brain_but_do_not_contact arch_beneath_brain_to_articulate_on_ventral_midline arch_beneath_brain_and_fuse_on_ventral_midline, 46 GKMRB_39_Frontal_subolfactory_process_depth_from_skull_roof_to_palatine/25_35% 42_53% 58_68% 75_85% >89%, 47 GKMRB_40_Frontal_subolfactory_process_parasphenoid_body_suture/absent present, 48 NEW_Frontal_subolfactory_process_descending_lamina/absent present, 49 NEW_Frontal_subolfactory_process_descending_laminae_clasp_parasphenoid_rostrum_dorsal_margin/absent present, 50 NEW_Frontal_subolfactory_process_descending_lamina_position_relative_to_one_another/broadly_separated narrowly_separated, 51 GKMRB_42_Frontal_subolfactory_processes_delimit_deep_narrow_canal_across_most_of_orbit/absent present, 52 GKMRB_43_Frontal_subolfactory_process_prefrontal_lamina/absent produced_into_shelf_supporting_prefrontal_ventrally, 53 GKMRB_44_Frontal_subolfactory_process_anterior_end/unmodified forms_thickened_anterolaterally_projecting_flange, 54 GKMRB_45_Medial_frontal_pilar/absent separated_from_subolfactory_process_by_gap sutured_to_subolfactory_process fused_with_subolfactory_process, 55 GKMRB_46_Medial_frontal_flange_separating_olfactory_tracts/vertically_positioned slants_forward_anterior_margin_of_subolfactory_process_in_front_of_anterior_margin_of_frontal_dorsal_lamina slants_backwards_anterior_margin_of_subolfactory_process_behind_anterior_margin_of_frontal_dorsal_lamina, 56 GKMRB_47_Frontal_descending_process_parietal_contact_in_horizontal_section/no_contact parietal_overlaps_frontal_laterally frontal_descending_process_abuts_parietal frontal_descending_process_overlaps_parietal_at_least_in_part, 57 GKMRB_48_Frontal_interorbital_width/frontoparietal_suture_width_I 14_19% 20_22% 28_34% 36_40%, 58 GKMRB_49_Frontal_interorbital_width/frontoparietal_suture_width_II <44% 44_47% 50_53% 55_58% 60_63%, 59 GKMRB_50_Frontal_broadly_overlaps_prefrontal_dosally/absent present, 60 GKMRB_51_Frontal_supraorbital_shelf/absent present demarcated_medially_by_narrow_shallow_longitudinal_furrow_often_bearing_row_of_foramina, 61 GKMRB_52_Frontal_anterior_margin_shape/mainly_trends_anteromedially broadly_transverse, 62 GKMRB_53_Frontal_anteroposteriorly_narrow_blunt_prefrontal_process_off_lateral_base_of_subolfactory_process_extends_into_prefrontal_socket/absent present, 63 GKMRB_54_Frontal_posterior_margin_convex_and_parietal_anterior_margin_concave_in_sagittal_section/absent present, 64 GKMRB_55_Fronto_parietal_suture_fused/separate fused, 65 GKMRB_56_Fronto_parietal_suture_interdigitation/frontal_overlaps_parietal_dorsally lightly_interdigitate_or_simple_abutment moderate_interdigitation strong_interdigitation deeply_interdigitate, 66 57_Fronto_parietal_suture_dorsal_outline/bowed_anteriorly_or_inverted_U roughly_transverse shallow_U_or_W_bowed_posteriorly deeply_bowed_posteriorly_U_or_W frontal_postero_dorsolateral_corner_protrudes_posterolaterally_xx_could_make_separate_character, 67 GKMRB_58_Fronto_parietal_suture_lateral_overlap/frontal_deeply_overlaps_parietal frontal_barely_overlaps_parietal_laterally frontal_underlaps_parietal_laterally, 68 GKMRB_59_Frontoparietal_fontanelle_in_adult/absent present, 69 GKMRB_60_Suture_between_frontal_and_parietal_in_medial_wall_of_orbit/strongly_anteriorly_inclined vertical_or_slightly_anteriorly_inclined, 70 GKMRB_61a_Frontal_suboptic_shelf/absent present, 71 GKMRB_61b_Frontal_suboptic_shelf_parietal_contact_below_optic_foramen/close_to_or_in_contact_with_parietal widely_separated_from_parietal, 72 NEW_Frontal_suboptic_shelf_depth_below_optic_foramen/shallow_just_beyond_top_of_sphenoid_rostrum deep_more_than_half_way_to_ventral_margin_of_sphenoid_rostrum, 73 GKMRB_62_Postfrontal/present_as_separate_element_throughout_ontogeny absent fused_to_postorbital fused_to_frontal, 74 GKMRB_63_Postfrontal_shape_along_skull_roof/triradiate_postorbital_pairetal_process_at_least_twice_as_long_as_frontal_process_wrapping_around_frontoparietal_suture parietal_process_absent_postfrontal_subtriangular, 75 GKMRB_64_Postfrontal_distal_shape/tapering_to_point_passing_anterior_to_postorbital bifid_clasps_postorbital, 76 GKMRB_65_Postfrontal_relative_to_parietal_table/ventrolateral dorsal_overlap_extensive, 77 GKMRB_66_Postfrontal_jugal_articulation/widely_separated nearly_in_contact in_contact, 78 GKMRB_67_Postfrontal_supratemporal_shelf/absent present_as_thin_shelf_extending_over_anterodorsal_corner_of_supratemporal_fenestra extending_posteriorly_to_occlude_upper_temporal_fenestra, 79 GKMRB_70_Postfrontal_enlarged_and_flat/not often_very_broad_always_antero_posteriorly_extensive_and_flat_with_postorbital_process_reduced_to_nub with_a_shaft_that_is_club_shaped_distally, 80 GKMRB_68_Postorbital/present absent, 81 NEW_Postorbital_discrete_tab_underlaps_postfrontal_anteriorly_near_jugal_articulation/absent_ present, 82 GKMRB_69_Postorbital_shape/widens_anteriorly narrows_anteriorly, 83 GKMRB_71_Postorbital_parietal_contact/postorbital_entirely_distal_separated_by_postfrontal_from_parietal partly_posterior_to_postfrontal to_contact_parietal_ventrolaterally_at_frontoparietal_suture, 84 NEW_Postorbitofrontal_orbital_rim_development/deep shallow, 85 GKMRB_73_Postorbital_with_small_compressed_tab_at_apex_passing_across_frontoparietal_suture/absent present, 86 GKMRB_76_Postorbital_restricts_upper_temporal_fenestra_UTF/absent_postorbital_tapers_to_tip partly_occludes_UTF_as_postorbital_expands_medially_posteriorly enlarged_postorbital_nearly_completely_occludes_UTF, 87 GKMRB_77_Postorbital_nearly_excludes_squamosal_from_upper_temporal_fenestra/absent present, 88 GKMRB_78_Postorbital_overlaps_squamosal/laterally_into_v_shaped_recess_in_squamosal dorsomedially_as_slender_tapering_rod_attached_superficially dorsally squamosal_lies_in_trough_beneath_postorbital, 89 GKMRB_79_Postorbital_squamosal_suture/firm_suture_no_wider_than_those_among_surrounding_elements loose_sutural_gap_wider_than_that_between_postorbital_and_postfrontal_or_postorbital_and_jugal, 90 GKMRB_80_Postorbital_firmly_sutured_to_skull_roofing_bones_postfrontal_or_parietal/present postorbital_tapers_to_blunt_tip_separated_from_parietal, 91 GKMRB_81_Postorbital_ectopterygoid_contact/absent present, 92 GKMRB_82_Postorbital_jugal_ramus_shortens/extends_deep_to_quadrate_head to_level_of_quadrate_head or_above_quadrate_head, 93 GKMRB_83_Postorbital_jugal_suture/long_firm_immobile_suture_with_jugal_largely_ventrolateral_to_postorbital jugal_tapers_smoothly_to_apex_which_is_loosely_joined_to_lateral_face_of_postorbital, 94 GKMRB_85_Postorbital_spreads_onto_dorsal_surface_of_postfrontal/absent present, 95 GKMRB_87_Postorbital_extent_posteriorly/to_end_of_parietal_table_or_less posterior_to_parietal_table, 96 GKMRB_88_Parietal_fusion/paired fused, 97 GKMRB_89_Parietal_ventral_lappet/poorly_developed_or_absent prominent_V_shaped_flat_process, 98 GKMRB_90_Parietal_temporal_muscles_originate/dorsally_on_parietal_table_and_supratemporal_process_of_parietal ventrally_on_parietal_table_and_dorsally_on_supratemporal_process ventrally_on_parietal_table_and_supratemporal_process, 99 GKMRB_91_Parietal_temporal_fossa_shape/temporal_muscles_originate_dorsally_across_entire_parietal_table_all_the_way_to_frontal_anteriorly_at_least_laterally anterolateral_corner_of_temporal_fossa_terminates_posteriorly_dorsal_and_ventral_margins_of_temporal_fossa_converge_behind_frontal_so_parietal_table_extends_as_flat_surface_toward_orbital_margin_and_temporal_muscles_are_confined_laterally, 100 GKMRB_93_Parietal_sagittal_crest/absent present projecting_dorsally, 101 GKMRB_94_Parietal_nuchal_fossa_width/narrow wide overgrown_by_parietal_nearly_to_midline, 102 GKMRB_95_Parietal_postparietal_projection_near_midline_bifid_distally_or_not/absent present, 103 GKMRB_96_Parietal_supraoccipital_contact/absent parietal_overlaps_supraoccipital_on_midline abuts_supraoccipital_on_midline dorso_ventral_parasagittal_abutment supraoccipital_around_processus_ascendens_tectum_synoticum_forms_stout_flat_topped_pedicle_that_abuts_parietal_posteroventromedially, 104 GKMRB_97_Parietal_bifid_supraoccipital_process/absent clasping_supraoccipital_crest, 105 GKMRB_98_Parietal_descending_lamina_articulates_with_supraoccipital_ascending_lamina/absent present, 106 GKMRB_99_Parietal_extent_over_braincase_in_dorsal_view/does_not_cover_occiput covers_nearly_all_of_occiput with_emarginate_lateral_fossae, 107 GKMRB_100_Parietal_posterior_marginin_dorsal_view/does_not_form_an_elongate_slender_and_pointed_posterior_process does_form_an_elongate_slender_and_pointed_posterior_process, 108 Distinct_lateral_ridge_of_parietal_extending_posteriorly_from_anterior_lateral_wing_up_to_prootic_39_Z&S/absent present, 109 GKMRB_101_Parietal_supratemporal_process_length/directed_laterally reduced_less_than_25%_of_parietal_width absent, 110 GKMRB_102_Parietal_supratemporal_process_orientation/directed_laterally directed_posterolaterally directed_posteriorly, 111 GKMRB_103_Parietal_contribution_to_back_of_the_upper_temporal_fenestra/short_supratemporal_process_parietal_only_forms_about_half_of_the_upper_temporal_fenestra_posterior_arch_with_supratemporal_forming_distal_half long_parietal_supratemporal_process_extends_distally_to_near_the_quadrate_head, 112 GKMRB_104_Parietal_foramen/present absent, 113 GKMRB_105_Parietal_foramen_position/in_parietal at_frontoparietal_suture in_frontal, 114 GKMRB_106_Parietal_supraorbital_process/absent present deeply_clasping_frontal_orbital_margin, 115 GKMRB_107_Parietal_postorbital_process/absent_parietal_barely_if_at_all_laps_behind_postorbital_apex_in_horizontal_section parietal_vertically_oriented_lappet_extends_laterally_to_overlap_postorbital_to_form_anteromedial_margin_of_upper_temporal_fenestra, 116 GKMRB_108_Parietal_epipterygoid_process/absent distinct_process reaches_alar_process_of_prootic, 117 GKMRB_109_Parietal_prootic_contact/absent contact_at_apex_of_alar_process extensive_conformable_contact ventral_process_of_parietal_overlaps_prootic_alar_process_laterally, 118 LBG_171_Parietal_enclosing_brain_laterally/uninflated inflated, 119 Medial_parietal_pillar_separates_the_telencephalon_from_the_mesencephalon_Zaher_and_Scanferla_2012/absent present_cut_at_about_mid_height_of_auditory_chamber with_pronounced_ridge_separating_the_telencephalon_from_the_mesemcephalon_of_the_brain, 120 GKMRB_110_Parietal_ventral_triangular_downgrowths_of_temporal_muscle_origin_overlaps_prootic_laterally_with_latter_abutting_former_medially_just_anterior_to_supraoccipital/absent present, 121 GKMRB_111_Maxilla_post__premaxillary_process_contact/absent present_or_nearly_so_but_always_excluding_premaxilla_from_vomer_dorsally, 122 GKMRB_112._Maxilla_premaxillary_process_dorsal_surface_grooved_often_enclosed_for_passage_of_a_deeper_and_more_internally_placed_ramus_of_the_subnarial_artery/absent present, 123 GKMRB_113._Maxilla_and_vomer_contact_at_anterior_margin_of_fenestra_exochoanalis/absent present, 124 GKMRB_114._Maxilla_facial_process_length/maxilla_length 10_20% 16_23% 25_36% 38_55% >56%, 125 GKMRB_115._Maxilla_facial_process_height/tall_to_skull_roof reduced absent columnar_process_received_in_longitudinal_concavity_on_anterior_face_of_prefrontal, 126 GKMRB_116._Maxilla_facial_process_apical_surface_faces/laterally dorsolaterally anterodorsally sharp_medial_inflection_roofing_more_or_less_external_naris_from_canthal_crest, 127 GKMRB_117._Maxilla_facial_process_medial_face_with_a_posterodorsally_trending_ridge_demarcating_the_anterior_limits_of_a_shallow_oval_fossa_bordered_by_the_lacrimal_and_infraorbital_canals_posteriorly/absent present, 128 LBG_180._Maxilla_supradental_shelf_development/present_with_acute_medial_margin_throughout_length reduced_anterior_to_palatine_process, 129 GKMRB_118._Maxilla_narial_margin_rises_at/high_angle low_angle, 130 LBG_fig._2a_Maxilla_bears_discrete_narial_margin_on_facial_process_bordering_external_naris/present absent, 131 LBG_176_Maxilla_prominent_medially_projecting_palatine_process/absent present, 132 GKMRB_119._Maxilla_firmly_sutured_to_palatine/present separated_by_fibrous_gap loosely_ligamentous_via_finger_like_lateral_maxillary_process_of_palatine_and_medially_projecting_palatine_process_of_maxilla maxilla_free_of_palatine_suspended_from_prefrontal, 133 GKMRB_1194_Maxilla_pivots_on_prefrontal_to_erect_fang/absent present, 134 NEW_fig._134_Maxilla_palatine_process_base_lies_below_the_orbit_ZS_49_/base_less_than_half_exposed base_more_than_half_exposed, 135 NEW_fig._135_Maxilla_palatine_joint_angle_in_ventral_view/less_than_45_degrees more_than_45_degrees_posterior_margin_of_maxilla_palatine_process palatine_process_of_maxilla_produced_into_shelf_forming_incomplete_bony_secondary_palate tongue_and_groove_maxillary_palatine_joint, 136 LBG_188_Maxilla_accessory_foramen_posterior_to_palatine_process/absent present, 137 LBG_187_Maxilla_superior_alveolar_foramen_position/positioned_near_middle_of_palatine_process_and_opening_posterodorsally positioned_near_anterior_margin_of_palatine_process_and_opening_medially_or_posteromedially, 138 NEW_Maxilla_superior_alveolar_foramen/enclosed_in_canal_that_opens_over_base_of_palatine_process_on_supradental_shelf_of_maxilla runs_in_open_channel_on_dorsal_surface_of_maxillary_supradental_shelf_before_becoming_enclosed_in_maxilla two_smaller_foramina_one_above_base_of_palatine_process_and_another_foramen_well_anterior_to_that, 139 NEW_Maxilla_superior_alveolar_foramen_relative_to_anterior_base_of_palatine_process/dorsal ventral, 140 NEW_Maxilla_superior_alveolar_foramen_position_relative_to_ophidian_palatine_process/SAF_partly_enclosed_in_max_pal_process or_entirely_anterior_to_max_pal_process, 141 GKMRB_120._Maxilla_suborbital_ramus_extends_posteriorly/to_roughly_midorbit_or_anterior to_posterior_quarter_of_orbit to_posterior_edge_of_orbit posterior_to_orbit_or_frontoparietal_suture, 142 _GKMRB_121._Maxilla_suborbital_process_shape_below_ectopterygoid/tapers_posteriorly widens_below_articulation_ectopterygoid_flange_present, 143 GKMRB_122._Maxilla_jugal_depth_below_orbit/shallow deep, 144 GKMRB_123._Maxilla_suborbital_process_tip_shape_at_jugal_articulation/suborbital_margin_slopes_smoothly_to_tip with_distinct_step_or_v_shaped_notch_distally_at_jugal_articulation, 145 GKMRB_124._Maxilla_posterior_process_length/to_midorbit_or_longer to_anterior_half_of_orbit, 146 NEW_Maxilla_prominent_fossa_dorsally_above_fangs/absent present, 147 GKMRB_125._Intramaxillary_joint/absent present, 148 GKMRB_126._Prefrontal_reduction/not_reduced reduced absent, 149 GKMRB_127._Prefrontal_broadly_overlaps_frontal_posterodorsally/absent present, 150 GKMRB_128._Prefrontal_orbitonasal_margin_in_x_section/slopes_ventrolaterally vertical slopes_ventromedially extends_beneath_subolfactory_processes extends_to_near_contact_with_its_opposite_on_midline, 151 GKMRB_129._Prefrontal_posterior_extent_along_orbital_margin/terminates_in_anterior_half_of_orbit extends_to_midorbit extends_posterior_to_midorbit, 152 GKMRB_130._Prefrontal_boss/absent present in_projecting_canthal_crest, 153 GKMRB_131._Prefrontal_nasolacrimal_cornu/absent present, 154 NEW_Prefrontal_articulates_anterolaterally_with_the_frontal_ZS_23/prefrontal_curves_smoothly_anteromedially_in_roughly_parasagittal_plane_along_lateral_margin_of_frontal prefrontal_articulates_with_process_extending_medially_across_frontal_anterior_margin_between_nasal_and_frontal, 155 GKMRB_132._Prefrontal_medial_extent_across_anterior_frontal/prefrontal_extends_only_half_or_less_across_frontal_anterior_width extends_65%_or_less_across_frontal_anterior_width extends_85%_or_more_across_frontal_to_approach_midline, 156 NEW_Prefrontal_anteromesial_accessory_nasal_process/absent present, 157 GKMRB_133._Prefrontal_frontal_suture_in_x_section/prefrontal_arcs_gently_about_anterolateral_frontal_margin_along_entire_anteroposterior_length prefrontal_strongly_bifid_clasps_frontal_posteriorly_then_spreads_dorsally_and_reduced_ventrally_anteriorly prefrontal_fits_across_frontal_width_anteriorly_into_v_shaped_notch_above_prefrontal_flange, 158 GKMRB_134._Prefrontal_length_relative_to_height/long_anteroposteriorly short_anteroposteriorly, 159 LBG_165_Prefrontal_anterior_margin_deeply_emarginate_with_concave_anterior_margin_in_lateral_view_L_165/absent present, 160 GKMRB_135._Prefrontal_palatine_articulation/prefrontal_narrowly_or_not_at_all_in_contact_with_maxilla_lateral_to_palatine prefrontal_broadly_contacts_maxilla_supradental_shelf_lateral_to_palatine prefrontal_has_mobile_contact_with_maxilla rod_like_prefrontal_arched_dorsally_bifid_at_each_end_with_mobile_joints_at_maxilla_and_frontal_prefrontal_functionally_part_of_upper_jaw, 161 LBG_163_Prefrontal_shape_of_mobile_articulation_with_maxilla/without_distal_notch distal_notch_fits_onto_maxillary_tab, 162 ZS_Prefrontal_ventral_margin_of_lateral_surface_retains_only_posterior_contact_with_dorsal_surface_of_maxilla_Zaher_and_Scanferla_2012/absent present, 163 GKMRB_136._Prefrontal_arcs_about_orbitonasal_fenestra_with_posteroventromedial_corner_curving_inwards_toward_palatine_in_x_section/absent present, 164 Prefrontal_supramaxillary_shelf/absent present_roofs_maxillary_fossa_and_projects_lateral_to_frontal_articulation, 165 GKMRB_137._Lacrimal/present absent, 166 GKMRB_138._Lacrimal_position_relative_to_lacrimal_duct/lacrimal_with_broad_exposure_laterally_reaching_from_lateral_floor_of_lacrimal_duct_up_the_medial_face_of_the_maxilla_to_contact_a_lateral_process_of_the_prefrontal_that_roofs_the_lacrimal_duct_in_cross_section lacrimal_arches_over_the_lacrimal_duct_to_replace_the_prefrontal_dorsally_broadly_floors_the_lacrimal_duct_with_a_medial_process_posteriorly_passing_up_the_lateral_face_of_the_prefrontal_Pseudopus_apodus_anterior_close_up_cutaway_view_of_snout lacrimal_reduced_to_floor_of_lacrimal_duct_and_lingual_surface_of_maxilla_and_barely_if_at_all_exposed_laterally lacrimal_bone_reduced_ventrally_confined_mainly_to_dorsolateral_corner_of_lacrimal_duct, 167 GKMRB_139._Lacrimal_foramen_size/not_large large, 168 GKMRB_140._Lacrimal_foramen_number/one divided_on_orbital_surface divided_through_to_olfactory_surface, 169 GKMRB_141._Lacrimal_duct_position/between_prefrontal_and_lacrimal enclosed_in_prefrontal_except_ventrally enclosed_entirely_in_prefrontal, 170 GKMRB_142._Jugal_absent/present absent, 171 GKMRB_84_Jugal_contribution_to_posterior_orbital_margin/<_38% 39_52% 53_66% 67_80% >80%, 172 GKMRB_72_Jugal_shape_at_skull_roof_contact/jugal_tapers_to_tip_confined_to_parietal_sometimes_just_touching_frontal jugal_with_long_process_off_apex_that_broadly_overlaps_the_frontal, 173 GKMRB_143._Jugal_extent_anteriorly_with_respect_to_tooth_row/jugal_broadly_overlaps_level_of_posterior_maxillary_tooth_row jugal_does_not_reach_anterior_to_level_of_the_last_maxillary_tooth jugal_fails_to_reach_most_posterior_maxillary_tooth, 174 GKMRB_74_Jugal_dorsomedial_head_/undivided divided_into_two_heads, 175 GKMRB_86_Jugal_frontal_contact/on_parietal_only contacts_frontal, 176 GKMRB_144._Jugal_anterior_extent/broadly_separated_from_prefrontal reaches_level_of_prefrontal, 177 GKMRB_145._Jugal_lacrimal_overlap/jugal_lateral_to_lacrimal jugal_medial_to_lacrimal jugal_ventral_to_lacrimal, 178 GKMRB_146._Jugal_articulation_with_maxilla_in_cross_section/rounded_ventral_margin_of_jugal_and_shallow_and_more_rounded_contour_of_the_maxilla_supradental_shelf acute_ventral_margin_of_jugal_lies_in_narrow_longitudinal_groove_on_dorsal_surface_of_maxillary_supradental_shelf, 179 GKMRB_147._Jugal_lateral_extent_over_maxilla_in_cross_section/maxilla_suborbital_border_wraps_dorsally_around_jugal_external_margin jugal_laps_over_external_suborbital_margin, 180 GKMRB_148._Jugal_with_inverted_v_shaped_notch_clasping_suborbital_edge_of_maxilla/absent present, 181 GKMRB_149._Jugal_lateral_exposure_below_orbit/absent partly_exposed_above_orbital_margin_of_maxilla entirely_exposed_above_orbital_margin_of_maxilla, 182 GKMRB_150._Jugal_suborbital_ramus_height/shallow deep, 183 GKMRB_151._Jugal_suborbital_boss/absent present, 184 GKMRB_152._Jugal_postorbital_ramus_development/complete_bony_postorbital_bar incomplete_bony_postorbital_bar bony_postorbital_bar_absent, 185 GKMRB_153._Jugal_postorbital_ramus_shape_in_lateral_outline/narrow wide, 186 GKMRB_154._Jugal_contacts_squamosal/present absent, 187 GKMRB_155._Jugal_posterior_process/complete_lower_temporal_bar reduced_to_a_discrete_bony_posterior_process lost_entirely, 188 GKMRB_156._Jugal_posterior_process_orientation/more_posterior_in_orientation more_ventral_in_orientation, 189 GKMRB_157._Jugal_medial_ridge_pronounced/medial_ridge_weak_jugal_lateral_to_ectopterygoid_at_base_in_dorsal_view medial_ridge_pronounced_base_of_medial_ridge_projects_behind_ectopterygoid_base_in_dorsal_view, 190 GKMRB_158._Jugal_cross_section_at_level_of_ectopterygoid/subtriangular depressed, 191 NEW_Jugal_contacts_parietal/absent present, 192 NEW_Jugal_suborbital_process/present absent, 193 NEW_Jugal_Maxilla_suture/firmly_sutured_ weekly_sutured_via_ligamentous_connection, 194 NEW_Jugal_articulation_relative_to_parietal_lateral_wings/dorsal ventral both_jugal_clasps_lateral_wing, 195 NEW_Jugal_overlaps_parietal/present absent_jugal_entirely_lateral_to_parietal, 196 159._Squamosal/present absent, 197 160._Squamosal_supratemporal_ramus_length_relative_to_epipterygoid_position/squamosal_does_not_extend_anterior_to_level_of_epipterygoid squamosal_extends_anterior_to_level_of_epipterygoid, 198 161._Squamosal_temporal_ramus_parietal_contact/temporal_ramus_diverges_from_parietal_supratemporal_process temporal_ramus_broadly_contacts_parietal_supratemporal_process, 199 162._Squamosal_base_of_temporal_ramus/diverges_from_parietal lies_against_parietal, 200 163._Squamosal_temporal_ramus_width/slender widens_anteriorly_with_medial_shelf_along_parietal_that_roofs_posterior_end_of_upper_temporal_fenestra, 201 164._Squamosal_temporal_ramus_shape/compressed depressed, 202 165._Squamosal_ascending_process/fully_developed reduced_to_nub absent, 203 NEW_Squamosal_with_distinct_transverse_facet_for_quadrate_head/present absent_abutting_at_tip_only, 204 166._Supratemporal/present lost, 205 167._Supratemporal_shortens/supratemporal_longer_than_squamosal_parietal_contact supratemporal_shorter_than_squamosal_parietal_contact supratemporal_very_small, 206 168._Supratemporal_lengthens/stops_short_of_level_of_parietal_notch subequal_in_anterior_extent_with_level_of_parietal_notch anterior_to_level_of_parietal_notch, 207 169._Supratemporal_anterior_suture_with_parietal_shape/supratemporal_lies_flat_against_supratemporal_process_of_parietal enters_slot_in_supratemporal_process_of_parietal, 208 170._Supratemporal_position_on_parietal/partly_ventral partly_ventrolateral all_lateral dorsal_on_either_parietal_or_braincase_alone, 209 Supratemporal_articulation/firm_osseous_connection_to_skull loose_fibrous_connection_to_skull, 210 171_Supratemporal_anterior_terminus/posterior_to_level_of_trigeminal_nerve_exit anterior_to_level_of_trigeminal_nerve_exit, 211 172._Supratemporal_overlaps_parietal_table/supratemporal_on_braincase_only_in_snakes_without_supratemporal_process_of_parietal supratemporal_extends_anteriorly_to_overlap_parietal_table_not_scored_in_snakes_with_reduced_or_absent_supratemporal, 212 173._Supratemporal_orientation/forward_from_quadrate_head up_from_quadrate_head, 213 174._Supratemporal_free_posteriorly/supratemporal_ends_near_attachment_to_braincase extends_freely_posterior_to_oto_occipital, 214 175._Supratemporal_hidden_in_dorsal_view/supratemporal_at_least_partly_exposed_dorsally_on_lateral_side_of_parietal_supratemporal_process slender_and_hidden_completely_from_view_by_parietal_squamosal_contact_dorsally, 215 176._Supratemporal_posterior_exposure_on_parietal_supratemporal_process/narrow_or_absent present_broadly, 216 181._Quadratojugal/present absent, 217 177._Quadrate_head_attachment/tapering_peg_like_head_loosely_attached_in_socket_formed_largely_by_squamosal quadrate_head_pivots_on_slender_tapering_tip_of_squamosal bluntly_abuts_supratemporal_and_squamosal, 218 178._Quadrate_head_suspended_from/supratemporal_and_squamosal_separate_quadrate_head_from_braincase_except_narrowly_beneath_tip_of_supratemporal quadrate_head_abuts_braincase_ventral_to_supratemporal quadrate_head_broadly_contacts_braincase_anteriorly, 219 179._Quadrate_suprastapedial_process/absent present, 220 quadrate_broad_with_subrectangular_shape_72_Z&S/absent present, 221 180._Quadrate_lateral_conch/present absent, 222 182._Quadrate_pterygoid_overlap/extensive short_overlap_or_small_lappet very_narrow_overlap_or_lappet_absent no_overlap_ligamentous_connection_only, 223 183._Quadrate_accessory_process_arising_off_anteromedial_edge_near_quadrate_head_abuts_braincase_in_region_of_horizontal_semicircular_canal/absent present, 224 184._Quadrate_stylohyal_process_on_medial_face_of_quadrate/absent present_as_oval_disc present_as_narrow_cylindrical_ridge, 225 185._Quadrate_to_braincase_ratio_braincase_depth_measured_from_near_the_quadrate_head/less_than_50% 50_59% 60_69% 70_74% more_than_79%, 226 186._Quadrate_pythonomorph/bowed_more_or_less_but_not_in_both_lateral_and_posterior_views_Uranoscodon_superciliosus_lateral_close_up_of_temporal_region massive_and_strongly_bowed_anteriorly_in_lateral_view_and_laterally_in_posterior_view_throughout_length_and_with_prominent_ventrally_directed_suprastapedial_process_forming_cavum_tympani, 227 187._Quadrate_foramen_size/large tiny, 228 188._Quadrate_slopes_anteroventrally_more_than_90o__equal_to_anterior_slope_from_quadrate_head/vetical_to_posterior_slope 4_107_degrees 108_121_degrees 122_135_degrees more_than_or_equal_to_136_degrees, 229 189._Quadrate_slopes_posteroventrally_less_than_90o__equal_to_posterior_slope_from_quadrate_head/vertical_to_anterior_slope_87_93_degrees 86_68_degrees 67_49_degrees 48_31_degrees less_than_30_degrees, 230 NEW_Quadrate_proximal_head_with_prominent_anterior_process/absent present, 231 NEW_Quadrate_lateral_crest_off_head_boarders_ventral_fossa/absent present, 232 NEW_Quadrate_rod_like/absent present with_triangular_dorsal_process_distally, 233 190._Stapes_traversed_by_stapedial_artery/imperforate perforate, 234 191_Stapes_shaft_length_78_ZS/longer_than_diameter_of_stapedial_footplate equal_to_or_shorter_than_stapedial_footplate, 235 NEW_Stapes_shaft_bent_at_base_78_ZS/straight bent_at_base, 236 192._Stapedial_footplate_size/small large, 237 193._Stapedial_footplate_size_relative_to_fenestra_ovalis/does_not_fill_fenestra_ovalis fills_fenestra_ovalis, 238 NEW_Stapedial_footplate_orientation_at_base_of_shaft/lateral_edge_of_footplate_well_anterior_to_medial lateral_edge_of_footplate_nearly_in_same_x_sectional_plane_as_medial_edge, 239 194._Fenestra_ovalis_orientation/opens_directly_laterally opens_ventrolaterally opens_posterolaterally_dorsolaterally, 240 195._Extracolumella/present absent, 241 196._Septomaxilla/present lost, 242 197._Septomaxilla_dorsolateral_contacts/no_contacts abuts_laterally_with_nasal_only abuts_laterally_with_prefrontal_only, 243 198._Septomaxilla_anterior_end/meets_maxilla_in_immovable_joint mobile_septomaxilla_not_contacting_maxilla, 244 199._Septomaxilla_position_relative_to_vomeronasal_organ/occupies_a_lateral_position_not_contributing_to_nasal_cavity_or_to_roofing_of_vomeronasal_organ occupies_a_more_medial_position_contributing_to_nasal_cavity_and_roofing_vomeronasal_organ, 245 200._Dorsal_expansion_of_septomaxilla/flat_or_weakly_convex_vomeronasal_organ_small expanded_and_convex_reflecting_large_size_of_vomeronasal_organ, 246 NEW_Septomaxilla_exposure_dorsally/septomaxilla_covered_by_nasal_or_only_slightly_exposed_dorsally_lateral_to_nasal_margin septomaxilla_broadly_exposed_dorsally_below_nasal, 247 201._Septomaxilla_contacts_dorsal_surface_of_palatal_shelf_of_maxilla/absent present, 248 202._Septomaxilla_divides_vomeronasal_organ/absent present, 249 203._Septomaxilla_long_posterodorsally_directed_blade_like_process_medial_flange_nearly_to_frontal/absent present_but_nasal_intercedes_between_septomaxilla_and_frontal extends_to_frontal_beneath_nasal develops_an_expanded_faceted_articulation_with_the_frontal, 250 204._Septomaxilla_lateral_flange/absent present reaches_well_above_roof_of_vomeronasal_organ, 251 ZS_2012_10._Septomaxilla_lateral_flange_apex_widely_separated_from_lateral_margin_of_nasal_in_dorsal_view_/absent present, 252 ZS_2012_17_Septomaxilla_lateral_flange_relative_to_VNO_opening_/posterior_base_of_lateral_flange_located_at_or_behind_palatal_opening_of_VNO posterior_base_of_lateral_flange_distinctly_cranial_to_VNO, 253 205._Septomaxilla_medial_flange/absent present, 254 NEW_Septomaxilla_lateral_flange_base_length_relative_to_lateral_margin_length/broad_based_more_than_one_third_lateral_margin narrow_based_posteriorly, 255 NEW_Septomaxilla_anterolateral_tip_shape/tapers_down_smoothly_to_tip with_conspicuous_hook_like_process, 256 206._Septomaxilla_median_flange_along_skull_midline/short_not_reaching_level_of_prefrontal long_extends_posteriorly_to_anteroposterior_level_of_anterior_margin_of_prefrontal, 257 207._Septomaxilla_posterior_process_on_laterally_ascending_flange/short_or_absent long_extends_posteriorly_deep_to_prefrontals, 258 208._Nervus_ethmoidalis_medialis/above_septomaxilla enclosed_in_septomaxilla_anteriorly in_anterior_half_of_septomaxilla enclosed_posteriorly_in_septomaxilla, 259 209._Vomeronasal_organ_fungiform_body/simple_diverticulum_of_nasal_capsule completely_separated_from_nasal_capsule_with_fungiform_body, 260 NEW_VNO_mushroom_body_/unossified_except_at_base ossified_fully, 261 NEW_VNO_mushroom_body_ossification_degree/weak prominent, 262 NEW_Vomer_ossified_mushroom_body_extent_posteriorly_relative_to_vomeronasal_opening/terminates_two_thirds_or_less_of_length_of_vomeronasal_opening reaches_to_level_of_posterior_quarter_or_more_of_vomeronasal_opening, 263 NEW_Vomer_lateral_wall_of_VNO_capsule_anterior_extent_relative_to_mushroom_body/lateral_capsular_wall_terminates_posterior_to_level_of_mushroom_body lateral_capsular_wall_extends_anterior_to_level_of_base_of_mushroom_body, 264 NEW_Vomer_VNO_fossa_anteromedial_extent_relative_to_vomeronasal_opening_/to_medial_apex_of_vomeronasal_notch anterior_to_medial_apex_of_vomeronasal_notch to_anteriormost_margin_of_vomeronasal_opening, 265 NEW_Vomer_premaxilary_process_tip_shape/short_projection tipped_with_finger_like_process_that_approaches_end_of_septomaxilla, 266 NEW_Vomer_capsule_ventral_margin_extends_further_laterally/absent present, 267 210._Cupola_for_vomeronasal_organ_even_if_only_narrowly/fenestrated_medially closed_medially, 268 211._Vomeronasal_organ_and_mushroom_body/not_fully_enclosed_by_septomaxilla_and_vomer_only fully_enclosed_by_septomaxilla_and_vomer_only, 269 212._Vomer_fusion/paired partly_fused fully_fused, 270 213._Vomer_length/vomer_short_caudal_end_extends_backwards_no_further_than_anteriormost_contact_of_palatine_with_maxilla vomer_long_caudal_end_extends_backwards_beyond_anteriormost_contact_of_palatine_with_maxilla_or_anterior_base_of_palatine_process_of_maxilla_when_the_two_do_not_articulate_closely, 271 214._Vomer_shape/main_portion_plate_like main_portion_rod_like, 272 215._Vomer_when_looking_at_skull_in_ventral_view_overlaps_dorsally_the_palatal_shelf_of_the_maxilla_behind_posterior_margin_of_opening_of_vomeronasal_organ/absent present, 273 216._Vomer_maxilla_relation/does_not_establish_any_sutural_contact_with_the_palatal_shelf_of_the_maxilla_behind_the_incisura_Jacobsoni establishes_narrow_contact_with_the_palatal_shelf_of_the_maxilla_behind_the_incisura_Jacobsoni vomer_maxilla_contact_formed_mainly_by_tab_off_palatal_shelf_of_maxilla, 274 217.__Vomer_to_vomeronasal_organ_VNO_relation/vomer_ventral_to_VNO encapsulates_VNO_posteriorly_and_medially with_margins_of_enclosing_posterior_wall_sloping_ventrolaterally further_expanded_laterally_to_completely_encapsulate_VNO_posteriorly, 275 218._Vomer_meets_septomaxilla/at_posterior_margin_of_opening_of_vomeronasal_organ at_lateral_margin_of_opening_of_vomeronasal_organ, 276 219._Margin_of_vomer_at_opening_of_vomeronasal_organ/flat curled_downwards, 277 220._Vomeronasal_nerve_exit/dorsal_to_vomer via_canals_dorsally_on_vomer via_foramen_at_back_end_of_vomer via_sieve_like_arrangement_of_foramina_through_back_of_vomer, 278 221._Vomer_degree_underlap_of_palatine/just_at_tips extending_posteriorly_to_level_of_maxilla_ectopterygoid_first_contact, 279 222._Vomer_ventral_longitudinal_ridges/absent long_and_converge_toward_midline_well_developed_below_vomeronasal_nerve_exit_from_septomaxilla short_parasagittal_ridges_anteriorly_on_vomer_at_level_of_vomeronasal_duct_opening discrete_canals_anteriorly_on_vomer_delimited_by_lateral_ridges_and_median_ridge, 280 223._Vomer_septum_transversely_fenestrate/absent present at_posteroventral_corner_of_vomer_septum, 281 224._Vomer_septum_vertical_lamina_height/low_not_forming_septum partly_separating_olfactory_chambers nearly_completely_separating_olfactory_chambers_along_with_septomaxilla_and_nasal only_ventral_edge_of_septum_remains v_shaped_notch_separates_dorsal_and_ventral_rami_of_vomer_septum, 282 _225._Vomer_posterodorsal_margin_forms_expanded_hollow_flange/absent present, 283 NEW_Vomer_dorsal_trough/absent present, 284 226._Vomer_posterior_horizontal_flange_dorsally_walls_vomeronasal_organ_posteriorly/absent present, 285 227._Vomer_contact_with_subolfactory_process_of_frontal/absent present, 286 228._Descending_tubercle_or_ridge_on_vomer_at_palatine_vomer_junction/absent present ridge_tubercle_present_on_vomer_and_or_adjacent_palatine, 287 229._Foramina_on_palatal_surface_of_vomers_near_midline/paired single, 288 230._Vomerine_teeth/present absent, 289 231._Palatines/separated anterior_contact_only contact_extends_to_midpoint_or_beyond, 290 232._Palatine_relative_to_maxilla_lacrimal_jugal_articulation/palatine_sits_medial_to_lacrimal_and_or_jugal_and_maxilla_in_cross_section palatine_inserts_between_lacrimal_and_or_jugal_and_maxilla_in_cross_section, 291 233._Palatine_dorsal_canal/shallow_longitudinal_sulcus upturned_lateral_and_medial_edges_of_palatine_demarcate_deep_narrow_canal_ending_in_enclosed_fossa, 292 234._Palatine_vomerine_process_dorsally_on_vomer/vomer_attaches_over_entire_face_of_palatine_vomerine_proces narrow_slender_tip_of_palatine_loosely_attached_to_vomer long_slender_palatine_process_clasped_in_groove_on_dorsal_surface_of_vomer ventral_edge_of_palatine_vomerine_process_attached_ligamentously_between_bifid_vomer_palatine_processes, 293 235._Palatine_vomerine_process_buttresses_vomer/palatine_vomerine_process_tapers_anteromedially splays_laterally_at_tips_to_buttress_vomer_posteriorly, 294 236._Palatine_vomerine_process_passes_vomer/medial_to_vomer_tines lateral_to_vomer_tines_posteromedial_process_of_vomer, 295 237._Ventral_projections_from_anterior_end_of_palatine_near_palatine_vomer_suture/absent present, 296 238._Ventromedial_extension_from_maxillary_process_of_palatine_choanal_processes_of_palatine/present_but_not_descending_ventromedially present_but_descending_medioventrally_to_reach_in_between_or_close_to_posterior_tips_of_vomers absent, 297 239._Palatine_maxillary_process_position_with_respect_to_posterior_end/anterior_to_posterior_end_of_palatine_last_tooth_position_posterior_to_main_axis_process at_posterior_end_of_palatine_last_tooth_position_anterior_to_main_axis_process, 298 NEW_Palatine_maxilla_articulation/broad narrow_suture_at_anterolateral_margin, 299 NEW_Palatine_orientation_on_pterygoid/lies_in_same_plane palatine_diverges_strongly_anterodorsally, 300 LBG_198_Palatine_maxillary_process_prefrontal_contact_above_level_of_maxillary_tooth_row_198_L/absent present, 301 240._Palatine_contribution_to_suborbital_fenestra/reduced_posteromedially_and_pterygoid_broadly_exposed_in_suborbital_fenestra pterygoid_narrowly_enters_suborbital_fenestra palatine_fully_excludes_pterygoid_from_border_of_suborbital_fenestra, 302 241._Palatine_pterygoid_overlap/palatine_overlaps_pterygoid_at_tip_and_ectopterygoid_near_base_otherwise_lateral_in_position palatine_overlaps_pterygoid_dorsally_from_lateral_to_near_medial_margin_of_pterygoid_with_loose_abutment_laterally palatine_barely_overlaps_pterygoid_laterally_and_pterygoid_does_not_extend_well_anterior_to_ectopterygoid_jugal_maxilla_juncture palatine_barely_overlaps_pterygoid_joint_nearly_horizontal complex_pattern_of_clasping_projections, 303 NEW_Palatine_with_slot_dorsally_that_accommodates_vertical_flange_from_pterygoid/absent present, 304 ZS_65_Palatine_medial_overlap_with_pterygoid/short long, 305 242._Palatine_anterior_dentigerous_process/absent present_with_teeth, 306 ZS_60_Palatine_dentigerous_processes_converge_toward_midline_anterior_to_maxillary_process__/present palatine_dentigerous_processes_parallel_one_another_anterior_to_maxillary_process_or_diverge_anteriorly, 307 243._Palatine_dentigerous_process_reduced/long_bearing_six_or_more_teeth short_bearing_five_or_fewer_teeth, 308 244._Infraorbital_canal_divides_anteriorly_in_palatine/single_foramen_anteriorly double_anteriorly_with_medial_palatine_ramus_small_and_lateral_large, 309 245._Infraorbital_canal_position/lateral_between_palatine_and_dorsal_surface_of_supradental_shelf_of_maxilla medial_entirely_in_palatine, 310 246._Palatine_foramen/absent present_enters_palatine_dorsally_toward_its_anterior_end_to_pass_anteroventrolaterally_into_the_infraorbital_canal, 311 247._Palatine_choanal_process/curves_medially_and_meets_the_vomer_in_a_well_defined_articular_facet touches_or_abuts_the_vomer_without_articulation_or_remains_separated_from_vomer, 312 248._Palatine_choanal_process/forms_an_extensive_concave_surface_dorsal_to_the_ductus_nasopharyngeus narrows_to_form_a_curved_finger_like_process forms_a_short_vertical_or_horizontal_lamina_that_does_not_reach_the_vomer, 313 249._Palatine/simplicipalatinate incipient_duplicipalatinate intermediate fully_duplicipalatinate, 314 250._Palatine_choanal_fossa_development/absent present_anteriorly_on_palatine extending_about_half_way_back_on_palatine fully_developed_to_end_of_element, 315 251._Palatine_subchoanal_process_medial_edge_shape_in_ventral_view/present_only_on_anterior_one_third_of_palatine roughly_parasagittal, 316 252._Palatine_posterior_emargination_of_anterodorsal_margin_of_choanal_fossa/anterior_to_anteroposterior_midpoint_of_palatine_maxilla_suture extends_posterior_to_anteroposterior_midpoint_of_palatine_maxilla_suture, 317 253._Posteromedial_process_of_palatine/long_overlaps_at_least_two_pterygoid_teeth short_overlaps_no_more_than_one_pterygoid_tooth, 318 254._revised_Palatine_discete_planar_surface_extends_along_ventrolateral_margin_between_pterygoid_and_maxillary_sutures_lateral_to_choanal_fossa/absent present, 319 255._Palatine_teeth/present absent, 320 256._Palatine_teeth_size/enlarged_but_smaller_than_marginal_teeth highly_enlarged_similar_in_size_to_marginal_teeth, 321 257._Pterygoids/contacting_each_other palatal_rami_fully_separated, 322 258._Pterygoid_separation_on_midline/pterygoids_narrowly_separated_for_most_of_their_length broad_at_base_narrow_anteriorly broad_at_base_but_not_as_narrowly_separated_anteriorly broad_throughout_length, 323 259._Pterygoid_palatine_ramus/contacts_vomer does_not_contact_vomer, 324 260._Pterygoid_palatine_joint_length_of_complex_pattern_of_projections_in_snakes/long medium short, 325 261._Pterygoid_palatine_ramus_clasps_pterygoid_ramus_of_palatine/absent present, 326 262._Pterygoid_transverse_process_and_ectopterygoid_pterygoideus_muscle_insertion_nearly_as_deep_as_mandible_at_least_80%_mandible_depth_and_ectopterygoid_transversely_broad_covering_most_of_transverse_process_of_pterygoid_in_anterior_view/absent present, 327 263._Pterygoid_posterior_extent/pterygoid_does_not_reach_level_of_occipital_condyle pterygoid_reaches_well_posterior_to_level_of_occipital_condyle, 328 NEW_Pterygoid_transverse_process_development/distinct_well_defined_lateral_projection gently_curved_lateral_expansion_or_absent, 329 264._Pterygoid_quadrate_ramus_short_and_small_tightly_wrapping_around_posteromedial_ventromedial_if_quadrate_horizontally_oriented_surface_of_quadrate/absent present, 330 265._Pterygoid_quadrate_ramus/robust_rounded_or_triangular_in_cross_section_but_without_groove blade_like_and_with_distinct_longitudinal_groove_for_the_insertion_of_the_protractor_pterygoidei_muscle, 331 266._Pterygoid_ventral_flange_wing_shaped_extension_of_quadrate_ramus/absent present, 332 Pterygoid_quadrate_ramus_longitudinal_ventral_fossa/absent ventral_longitudinal_fossa_set_off_by_ventral_ridges_at_lateral_and_medial_marigns, 333 Pterygoid_quadrate_ramus_lateral_edge_curves_dorsally/absent present, 334 Pterygoid_quadrate_ramus_with_longitudinal_ridge_dorsolaterally_/absent present, 335 Pterygoid_quadrate_ramus_dorsal_longitudinal_fossa_orientation/faces_dorsomedially faces_medially_C_shaped, 336 Pterygoid_quadrate_ramus_notched_near_posteroventral_end/absent present_deeply_emarginate, 337 267._Pterygoid_teeth/present absent, 338 268._Pterygoid_teeth/small_conical_denticles enlarged_but_smaller_than_marginal_teeth highly_enlarged_similar_in_size_to_marginal_teeth, 339 269._Pterygoid_teeth/restricted_to_palatal_ramus_of_pterygoid extend_posteriorly_onto_quadrate_ramus_of_pterygoid, 340 270._Ectopterygoid/present absent, 341 271._Ectopterygoid_size_and_restriction_of_suborbital_fenestra/ectopterygoid_relatively_slender_fenestra_widely_open ectopterygoid_enlarged_medially_restricting_suborbital_fenestra ectopterygoid_highly_enlarged_medially_closing_suborbital_fenestra, 342 272._Ectopterygoid_angulation_in_dorsal_view/nearly_orthogonal_rami obtuse_angle, 343 273._Ectopterygoid_anterior_length/well_separated_from_palatine_above_maxilla near_to_or_in_contact_with_palatine, 344 2752_Ectopterygoid_with_slot_laterally_for_maxilla_articulation/absent present, 345 Ectopterygoid_degree_of_overlap_of_dorsal_surface_of_maxilla/narrow_overlap_dorsally broad_but_short_dorsal_overlap extensive_dorsal_overlap, 346 275._Ectopterygoid_maxilla_suture/ectopterygoid_lies_dorsally_at_least_in_part_along_supradental_shelf_of_maxilla ectopterygoid_abuts_posteromedial_corner_of_maxilla ectopterygoid_overlapping_maxilla_more_ventrally_than_dorsally interdigitating_suture, 347 276._Ectopterygoid_maxillary_process_shape_in_dorsal_view/tapers_or_parallel_sided widens_at_maxilla_overlap to_more_than_three_times_wider_anteriorly_relative_to_ectopterygoid_shaft, 348 277._Ectopterygoid_maxillary_process_anterior_notch/tapers_forward_of_maxilla_contact_or_at_least_maxillary_process_tapers_anteriorly_after_it_widens_notch_absent notched_anteriorly with_large_rectangular_lateral_ramus_produced_directly_laterally, 349 279._Ectopterygoid_lateral_edge_of_maxillary_ramus_at_maxilla_margin/slopes_medially straight, 350 278._Ectopterygoid_maxilla_suture/ectopterygoid_articulates_primarily_with_maxilla ectopterygoid_contacts_jugal_only, 351 280._Ectopterygoid_prefrontal_and_palatine_relations/ectopterygoid_does_not_underlap_palatine_posteriorly_below_prefrontal ectopterygoid_underlaps_palatine_below_prefrontal, 352 282._Ectopterygoid_hooked_posterior_process_flat_and_exposed_dorsally_ventrally_and_laterally/absent present, 353 283._Ectopterygoid_posterior_process/prominent small_lateral_knob absent, 354 284._Ectopterygoid_posterior_process_lengthens/does_not_extend_past_coronoid_apex extends_past_coronoid_apex, 355 285._Ectopterygoid_dorsal_process_height/tall short absent, 356 286._Ectopterygoid/does_not_contact_prefrontal contacts_prefrontal_at_base_of_orbit, 357 Ectopterygoid_overlap_of_pterygoid_200_L/embraces_pterygoid_anteriorly overlaps_dorsally abuts_laterally, 358 Ectopterygoid_pterygoid_overlap_position_of_former_relative_to_latter_at_overlap/overlap_dorsolateral_in_position_well_lateral_to_pterygoid_teeth broad_flange_spreads_onto_dorsomedial_face_of_pterygoid_just_above_tooth_row_and_caps_pterygoid_in_prominent_inverted_v_shaped_groove_near_caudal_apex, 359 Ectopterygoid_distal_tip_buttressed_by_medial_pterygoid_flange/absent present prominent, 360 288._Ectopterygoid_pterygoid_process_length/short longer_but_still_anterior_to_trigeminal_foramen longest_extending_posterior_to_trigeminal_foramen, 361 289._Ectopterygoid_overlap_of_pterygoid/short long, 362 290._Epipterygoid/present absent, 363 291._Epipterygoid_in_resting_position/located_lateral_to_prootic_even_if_only_narrowly_so located_entirely_anterior_to_prootic, 364 292._Epipterygoid_relative_to_alar_process_of_prootic/epipterygoid_anterolateral_to_prootic_alar_process epipterygoid_abuts_anteroventral_tip_of_alar_process, 365 293._Epipterygoid_shortens/long_reaches_nearly_to_level_of_top_of_braincase_or_above_quadrate_head_or_more_than_half_distance_between_pterygoid_and_parietal_table short_reaches_only_to_level_of_quadrate_head_barely_to_semicircular_canal_or_half_or_less_of_distance_between_pterygoid_and_parietal_table, 366 281._Ectopterygoid_palatine_ventral_articulation/palatine_maxilla_contact_excludes_ectopterygoid ectopterygoid_anterior_process_largely_separates_palatine_from_maxilla_posteriorly, 367 294._Epipterygoid_parietal_contact/absent overlaps_parietal_temporal_muscle_origin, 368 295._Epiptergyoid/expanded_dorsoventrally_and_ventrally columelliform, 369 296._Braincase_fusion/unfused_in_adult opisthotic_and_prootic_fused_in_adult complete_braincase_fusion_in_adult, 370 297._Processus_ascendens_of_synotic_tectum/absent present, 371 298._Supraoccipital/single double, 372 299._Supraoccipital_origin_of_temporal_muscles/restricted_to_parietal spread_onto_supraoccipital_contacting_nuchal_crest_in_roughly_T_shaped_outline spread_onto_supraoccipital_to_form_Y_shaped_crest temporal_muscles_spread_onto_braincase_dorsally_but_sagittal_and_nuchal_crests_join_to_form_roughly_anchor_shaped_outline, 373 300._Supraoccipital_nuchal_crest_lateral_extent/absent present_on_supraoccipital present_on_supraoccipital_and_otoccipital, 374 301._Supraoccipital_crest/absent present meets_ventral_parietal, 375 302._Supraoccipital_relative_to_oto_occipital_on_midline/overlaps_oto_occipital_laterally laps_over_oto_occipital_on_midline_as_part_of_sagittal_crest that_is_in_turn_capped_by_the_parietal_so_that_all_three_bones_are_visible_in_cross_section, 376 303._Supraoccipital_contribution_to_internal_sidewall_of_neurocranium/participates_in_sidewall absent_only_dorsal_plate_remains dorsal_plate_absent, 377 304._Epitotic_foramen/absent present, 378 305._Prootic_alar_process/small_or_absent prominent, 379 306._Prootic_supratrigeminal_process/absent weakly_developed_not_projecting_beyond_cupola_anterior present_as_a_finger_like_projection_above_trigeminal_notch_projecting_beyond_cupola_anterior, 380 307_Crista_prootica_ridge_on_lateral_surface_of_the_prootic_overhanging_facial_foramen/well_developed_lateral_flange reduced_to_weak_ridge absent, 381 308._Crista_prootica/does_not_extend_onto_basipterygoid_process extends_onto_basipterygoid_process_forming_open_or_closed_bony_canal, 382 309._Crista_prootica_aliform_in_outline_in_ventral_view_extended_butterfly_shape/absent present prominent_extending_further_laterally, 383 310._Crista_tuberalis_and_crista_prootica/separate combined_to_surround_stapedial_footplate_and_lateral_aperture_of_recessus_scalae_tympani, 384 Juxtastapedial_recess_defined_by_crista_circumfenestralis_80_ZS/absent present_but_open_posteriorly present_and_closed_posteriorly, 385 Prootic_cranial_rim_of_crista_circumfenestralis_caudal_extent_relative_to_medial_margin_of_stapedial_footplate/former_well_anterior_to_latter former_roughly_on_same_level_as_latter_in_dorsal_view_at_level_of_shaft, 386 Crista_circumfenestralis_degree_of_enclosure_of_stapedial_footplate_81_ZS/footplate_mostly_exposed edges_of_crista_converge_upon_stapes_to_conceal_most_of_footplate, 387 311._Crista_interfenestralis/prominent reduced absent, 388 Crista_interfenestralis_deeply_overlaps_stapedial_footplate_along_its_lateral_margin/absent present, 389 312._Crista_tuberalis/prominent reduced absent, 390 313._Facial_foramen_lateral_exit_on_prootic_for_the_facial_or_VII_cranial_nerve/single double, 391 exit_foramen_for_the_hyomandibular_branch_of_the_facial_nerve_is_located_inside_the_opening_for_the_mandibular_branch_of_the_trigeminal_nerve_91_Z&S/outside_via_long_canal inside_via_long_canal facial_nerve_exits_into_trigeminal_fossa_via_very_short_canal, 392 314._Prootic_participates_in_medial_aperture_of_the_recessus_scala_tympani_MARST/absent prootic_forms_part_of_MARST, 393 315._Posterior_auditory_foramen/bordered_by_opisthotic_oto_occipital_posteromedially enclosed_entirely_in_prootic, 394 316._Orbitosphenoid_calcified/ossified absent present expanded_to_floor_the_braincase, 395 317._Orbitosphenoid/well_developed reduced, 396 318._Orbitosphenoid/paired single_fused_ventrally, 397 319._Optic_foramen/present absent, 398 320._Optic_foramen/not_fully_enclosed_by_bone enclosed_partly_or_entirely_by_frontals entirely_within_orbitosphenoid entirely_within_parietal, 399 Optic_foramen_size/small medium large, 400 321._Trigeminal_foramen_or_foramina/anterior_margin_not_enclosed_in_bone anterior_margin_enclosed_by_descending_flange_of_parietal enclosed_by_prootic, 401 322._Trigeminal_nerve_maxillary_branch/pierces_the_lateral_maxillary_process_of_the_palatine passes_dorsally_between_the_palatine_and_the_prefrontal, 402 323._Ophidiosphenoid/absent present, 403 Retractor_pits_in_dosum_sellae/present absent_retractor_bulbi_muscles_absent, 404 324._Dorsum_sellae_shape_in_longitudinal_cross_section/crista_sellaris_forms_posterior_wall_usually_low_and_vertically_disposed_with_more_or_less_anterior_slope dorsum_sellae_poorly_differentiated_with_at_most_shallow_fossa_with_low_crista_sellaris enclosed_in_distinct_fossa_a_cup_like_depression_walled_laterally_and_ventrally_by_the_basisphenoid_and_anteriorly_by_the_parasphenoid_rostrum completely_enclosed_tube_like_dorsum_sellae, 405 325._Dorsum_sella_fossa_roofed_posteriorly_by_crista_sellaris_not_scored_in_species_with_reduced/absent_crista_sellaris fossa_only_modestly_roofed_by_crista_sellaris roofing_more_extensive_over_deep_fossa, 406 326._Sphenoidal_keel/absent present_below_dorsum_sellae deep_keel, 407 Spehenoid_rostrum_ventrolateral_margin_at_distal_tip/tapers_to_a_point distinctly_bifid_, 408 327a_Sphenoid_rostrum_with_prominent_ventrolaterally_directed_alae/absent prsent, 409 327b_Sphenoid_rostrum_trabeculae_relative_to_midline/trabecular_bases_wide_set close_set, 410 327c_Sphenoid_rostrum_trabecular_grooves/poorly_delimited_along_fronto_parasphenoid_contact prominently_delimited_over_most_of_rostrum, 411 327d_Sphenoid_rostrum_dorsal_margin_shape/not arrowhead_shaped_where_clasped_by_suboptic_ridges_on_subolfactory_processes, 412 Sphenoid_rostrum_broadly_exposed_dorsally_between_frontal_subolfactory_processes/absent present, 413 Sphenoid_rostrum_dorsal_surface_flat_against_base_of_frontal_subolfactory_processes_between_descending_laminae_/absent present, 414 Sphenoid_rostrum_behind_optic_foramen_narrow_102_Z&S/absent present, 415 Sphenoid_basioccipital_suture_transversely_crested_98_Z&S/absent present, 416 Sphenoid_lateral_wings_scored_as_per_95_ZS/absent present, 417 Crista_trabeculares_development_on_exanded_sphenoid_rostrum/short_and_or_indistinct elongate_and_distinct_in_lateral_view, 418 328._Cultriform_process_sphenoid_rostrum_length/long short absent, 419 329._Vidian_canal_rostral_opening/roofed_by_parietal exits_via_parasphenoid_rostrum_only, 420 Vidian_canal_number_anterior_openings_in_main_ramus/one two, 421 Vidian_canal_intracranial_course_anteriorly_running_atop_lateral_margin_of_rostrum_to_exit_between_parietal_and_sphenoid_92_ZS_modified/absent present, 422 330_Right_Vidian_canal_posterior_size_/small large, 423 330_Left_Vidian_canal_posterior_size/small large, 424 331._Trabeculae_cranii/tropibasic platybasic, 425 332._Basipterygoid_process_and_synovial_palatobasal_articulation/present_formed_by_ossified_basitrabecular_process present_formed_by_outgrowth_from_parabasisphenoid_no_basitrabecular_process_known_synovial_palatobasal_articulation_absent basipterygoid_process_absent, 426 333._Basipterygoid_process/long_i.e._projecting_far_beyond_the_body_of_the_basisphenoid short_i.e._not_projecting_very_far_beyond_the_body_of_the_basisphenoid, 427 334._Basipterygoid_process/not_expanded_at_distal_end distal_end_expanded, 428 335._Sesamoid_bone_at_basipterygoid_pterygoid_articulation/absent present, 429 336._Vidian_canal_formed_by_the_basisphenoid_enclosing_the_internal_carotid_artery_and_the_base_of_the_palatine_artery_as_they_pass_over_the_basipterygoid_process/absent present, 430 337._Vidian_canal_caudal_opening/within_basisphenoid anterior_margin_at_basisphenoid_prootic_suture entirely_within_prootic the_dibamid_amphisbaenian_condition, 431 Vidian_canal_caudal_entrance_position_relative_to_lateral_margin_of_sphenoid/laterally_placed_near_sphenoid_lateral_edge_or_further_posteriorly medially_placed_far_from_sphenoid_lateral_edge, 432 338._Carotid_artery_exits_rostral_end_of_Vidian_canal/at_same_level_or_slightly_above_as_the_remnant_of_the_embryonic_neurocranial_trabeculae below_the_level_of_the_remnant_of_the_embryonic_neurocranial_trabeculae, 433 the_parietal_margin_of_the_optic_foramen_is_concave_i.e._the_parietal_is_notched_by_the_optic_foramen_41_Z&S/absent present, 434 339._Basal_tubera_position/posterolateral_with_apex_on_lateral_edge_of_basioccipital_just_behind_base_of_prooticopisthotic_suture anteromedial_with_apex_at_lateral_juncture_of_sphenoid_and_basioccipital_anterior_and_medial_to_prootic_opisthotic_suture, 435 340._Apophyseal_ossification_caps_basal_tubera/absent present, 436 341._Occipital_condyle/posterior_surface_of_condyle_straight_in_ventral_view posterior_surface_of_condyle_concave_in_ventral_view, 437 342._Basioccipital/contributes_to_ventral_border_of_foramen_magnum excluded_from_ventral_border_of_foramen_magnum_by_contact_of_exoccipitals, 438 the_basioccipital_meets_the_sphenoid_in_a_suture_located_at_the_level_of_.._104_Z&S/fenestra_ovale_behind_facial_foramen facial_foramen trigeminal_foramen_foramina, 439 Occipital_condyle_shape_in_cross_section/not_circular_with_deep_notochordal_depression_dorsally_Anilius circular_without_notch_dorsally_Uropeltis, 440 343._Basioccipital_ventral_keel/absent crest keel, 441 344._Medial_aperture_of_the_recessus_scala_tympani_MARST/between_basioccipital_and_opisthotic entirely_in_opisthotic, 442 Recessus_scalae_tympani_floor/formed_by_basioccipital formed_by_oto_occipital, 443 345._Cranial_nerve_IX_exits_braincase_via/MARST_internally_and_lateral_aperture_of_recessus_scala_tympani_LARST_externally exits_dorsal_to_MARST_then_out_LARST, 444 346._Cranial_nerve_IX_exits_braincase_via/foramen_magnum laterally_via_LARST posteriorly_via_vagus_equal_tojugular_foramen, 445 347._Medial_aperture_of_the_recessus_scalae_tympani_MARST_subdivided_IX_cranial_nerve_exits_posteriorly/absent MARST_divided_into_anterior_and_posterior_openings_by_bony_process_with_IX_cranial_nerve_exiting_via_posterodorsal_foramen, 446 348._Vagus_foramen_far_from_MARST/with_hypoglossal_foramina_lying_below_and_between_them_medially vagus_foramen_closer_to_MARST_with_hypoglossal_foramina_extending_posterior_to_vagus, 447 349._Hypoglossal_XII_foramina_exits_relative_to_vagus_XÐXI_foramen_on_external_surface_of_braincase/hypoglossal_foramina_separated_from_vagus at_least_one_hypoglossal_foramen_emerges_from_the_same_fossa_as_the_vagus_foramen only_one_hypoglossal_foramen_still_exits_separately_from_the_vagus_foramen_fossa all_three_hypoglossals_emerge_from_the_same_fossa_as_the_vagus_foramen, 448 Vagus_jugular_foramen_concealed_in_lateral_view_by_crista_tuberalis_83_Z&H_2011/absent present, 449 350._LARST_lateral_aperture_of_recessus_scalae_tympani/open small closed, 450 351._Perilymphatic_foramen_faces/ventrally medially laterally posteriorly, 451 352._Opisthotic_exoccipital_fusion_to_form_oto_occipital/incompletely_fused_or_separate_in_adult completely_fused_early_in_post_hatching_ontogeny, 452 353._Oto_occipitals_exoccipital_part_contact_above_foramen_magnum_to_exclude_supraoccipital/absent present, 453 Oto_occipitals_broadly_in_contact_covering_occipital_condyle_in_dorsal_view/absent present instead_of_being_transverse_the_oto_occipital_posterior_margin_slopes_anteriorly_to_re_expose_occipital_condyle, 454 supratemporal_facet_on_otooccipital_is_sculptured_and_delineated_with_projecting_posterior_rim_that_overhangs_exoccipital_52_Z&S/absent present_scored_per_ZS, 455 Oto_occipital_posterolateral_processes_development_85_scored_as_per_ZS/short_and_narrow_do_not_extend_toward_posterior_margin_of_occipital_condyle wider_than_condyle_and_long_combine_with_crista_tuberalis_to_extend_to_approximate_posterior_margin_of_occipital_condyle, 456 354._Metotic_fissure/open subdivided_by_contact_of_basal_plate_and_otic_capsule, 457 paroccipital_process_of_otooccipital_reduced_to_a_short_projection_or_absent_79_Z&S/paroccipital_process_well_developed reduced_or_absent, 458 355._Mandibular_symphysis/anterior_tips_of_dentary_with_distinct_flat_symphyseal_area anterior_tips_of_dentary_smoothly_rounded_and_without_distinct_symphyseal_area, 459 Dentary_orientation_in_cross_section/more_or_less_vertical more_nearly_horizontal, 460 Mandible_curvature_in_lateral_view/straight_to_weakly_bowed conspicuously_bowed, 461 356._Dentary_anterodorsal_edge_of_dental_parapet_at_tip/straight tipped_medially, 462 357._Dentary_bowed_ventrally_along_long_axis/straight_to_slightly_bowed distinctly_bowed_ventrally, 463 358._Dentary_overlaps_postdentary_bones_laterally/extensive reduced, 464 359._Dentary_suspended_from/overlapping_parts_of_coronoid_surangular_prearticular_splenial_and_angular surangular prearticular, 465 Dentary_relative_length_of_rami_forming_kinetic_notch_173_of_Longrich/ventral_ramus_conspicuously_shorter_than_dorsal_by_at_least_4_tooh_positions_Afronatrix with_dorsal_and_ventral_rami_subequal_in_length_posteriorly_Calabaria ventral_ramus_conspicuously_longer_than_dorsal_ramus, 466 360._Dentary_subdental_shelf/gutter_development_in_anterior_part_of_dentary subdental_shelf_absent weakly_developed_subdental_shelf pronounced_subdental_gutter, 467 Dentary_lingual_margin_subdental_surface_below_gutter_216_217_Longrich/narrow_throughout_length deep_anteriorly_and_posteriorly, 468 361._Dentary_number_of_mental_foramina_on_lateral_surface/none one two three four_or_more, 469 362._Dentary_size_of_posteriormost_mental_foramen/same_size_as_others enlarged_relative_to_others, 470 363._Dentary_mental_foramen_position/near_tip_of_dentary displaced_caudally displaced_further_caudally, 471 364._Dentary_coronoid_process_posterior_termination/below_or_anterior_to_level_of_coronoid_apex just_behind_level_of_coronoid_apex well_posterior_to_level_of_coronoid_apex, 472 365._Dentary_subdental_shelf_hooks_around_anterior_rim_of_the_anterior_inferior_alveolar_foramen/absent present, 473 366._Dentary_surangular_process/lies_flat_against_the_dorsolateral_face_of_the_surangular_below_the_coronoid set_in_a_posterodorsally_trending_groove_open_dorsally_that_supports_it_from_below_on_the_dorsolateral_face_of_the_surangular_below_the_coronoid set_in_deep_V_shaped_laterally_facing_recess_on_dorsolateral_face_of_surangular_behind_coronoid, 474 367._Dentary_coronoid_process_posterodorsal_extension/absent_or_with_only_small_dorsal_extension large_but_extending_between_lateral_and_medial_processes_of_coronoid large_but_extending_dorsally_to_overlap_most_of_anterolateral_surface_of_coronoid extremely_well_developed_covering_almost_entire_lateral_surface_of_coronoid, 475 368._Dentary_angular_process_reduced/angular_process_extends_to_or_past_coronoid_apex anterior_to_coronoid_apex anterior_to_level_of_coronoid_bone, 476 Dentary_angular_process_termination_relative_to_splenio_angular_joint_174_of_Longrich/anterior_to_splenio_angular_joint posterior_to_splenio_angular_joint well_posterior_to_splenio_angular_joint, 477 Dentary_broad_flat_angular_process_lies_beneath_mandible_nearly_horizontally_diposed_in_vivo_209_L/absent present, 478 369._Dentary_posterior_termination_on_lateral_face_of_mandible/below_or_anterior_to_level_of_coronoid_apex just_posterior_to_coronoid_apex well_posterior_to_level_of_coronoid_apex nearly_to_posterior_surangular_foramen, 479 Dentary_V_shaped_kinetic_surangular_notch/absent present, 480 370._Dentary_angular_process_prominently_bifid/absent present, 481 Dentary_medioventral_crest_212_Longrich/absent present, 482 371._Meckels_canal/opens_medially_for_most_of_length opens_ventrally_anterior_to_anterior_inferior_alveolar_foramen, 483 372._Dentary_restricts_Meckels_canal/does_not_restrict_or_enclose_Meckelian_canal upper_and_lower_borders_form_sutural_contact_anterior_to_splenial Meckels_canal_closed_and_fused_anterior_to_splenial, 484 373._Splenial_attachment_to_dentary_above_MeckelÕs_canal/close_throughout_length loose_with_dorsal_dentary_suture_confined_to_posterodorsal_corner_of_splenial, 485 Splenial_extent_contact_to_dentary_posterodorsally_222_Longrich/broadly_separated_cranial_to_aiaf_and_broadly_articulated_caudally narrowly_articulated_caudally little_or_no_contact_caudally, 486 374._Splenial/present_as_separate_element fused_to_dentary lost, 487 375._Splenial_anterior_extent/around_one_third_or_less_length_relative_to_dentary_tooth_row about_one_half about_two_thirds three_fourths_or_more, 488 376._Splenial_posterior_extent/extends_posteriorly_to_or_beyond_apex_of_coronoid does_not_extend_posteriorly_to_apex_of_coronoid, 489 377._Splenial_angular_articulation/splenial_overlaps_angular with_ball_on_splenial_below_level_of_posterior_mylohyoid_foramen_fitting_into_socket_on_angular with_ball_on_angular_fitting_into_socket_on_splenial flat_abutting_joint, 490 378._Splenial_anterior_inferior_alveolar_foramen_aiaf_position_relative_to_dentary/enclosed_entirely_in_splenial between_splenial_and_dentary, 491 Splenial_anterior_inferior_alveolar_foramen/present absent, 492 379._Splenial_anterior_inferior_alveolar_foramen_position_relative_to_anterior_mylohyoid_foramen/anterodorsal dorsal_to_posterodorsal, 493 380._Angular/present absent, 494 381._Angular_posterior_extent/reaches_mandibular_condyle does_not_reach_mandibular_condyle, 495 Angular_length_posteriorly_182_Longrich/more_than_half_way_to_mandibular_condyle one_half_or_less_of_distance_to_mandiblar_condyle one_third_or_less_distance_to_mandibular_condyle, 496 382._Angular_taller_anteriorly_closely_approaching_coronoid_or_if_coronoid_absent_tooth_bearing_margin_of_dentary_above_Meckelian_canal/absent_angular_broadly_separated_from_coronoid present with_finger_like_process_over_arching_Meckels_canal, 497 383._Angular_medial_exposure_relative_degree_of_medial_exposure_scored_with_the_teeth_pointing_straight_up/broad reduced narrow, 498 384._Posterior_mylohyoid_foramen_position/absent medial ventral lateral, 499 385._Posterior_mylohyoid_foramen_position_relative_to_coronoid_apex/below posterior anterior, 500 386._Coronoid_eminence/present absent, 501 387._Coronoid_eminence_composition/formed_by_both_surangular_and_coronoid formed_exclusively_by_coronoid formed_exclusively_by_surangular, 502 388._Coronoid_anteromedial_process_fits_into_sulcus_beneath_tooth_bearing_border_of_dentary_at_or_behind_end_of_tooth_row/absent present and_wraps_around_ventral_margin_of_dentary_tooth_bearing_border_at_apex_posteriorly, 503 389._Coronoid_bone/present_well_developed present_small_and_straplike absent, 504 390._Coronoid_surangular_articulation/coronoid_restricted_to_medial_aspect_of_mandible coronoid_extends_onto_dorsal_surface_of_surangular coronoid_arches_over_dorsal_margin_of_mandible_to_reach_lateral_face_of_surangular, 505 391._Coronoid_anteromedial_process/present absent, 506 392._Coronoid_anteromedial_ventral_margin_at/behind_end_of_tooth_row overlapped_by_splenial abuts_splenial does_not_contact_splenial, 507 393._Coronoid_posteromedial_process/absent present, 508 394._Coronoid_anterolateral_dentary_process/absent present overlaps_dentary_tooth_row_deeply, 509 395._Coronoid_anterolateral_dentary_process_shape/extends_anteroventrally_and_smoothly_tapers_into_dentary extends_anteriorly_with_dorsal_and_ventral_margins_more_parallel_sided_terminating_in_a_blunt_edge_anteriorly, 510 396._Surangular_inserts_into_dentary_lateral_to_the_intramandibular_septum_entering_the_intramandibular_canal/absent present_slightly present_deeply, 511 Surangular_dentary_articulation_position_of_posterior_tooth_row/relatively_narrow_posterodorsal_tooth_bearing_portion_of_dentary_clasps_acute_dorsal_margin_of_compressed_surangular relatively_broad_posterodorsal_tooth_bearing_portion_of_dentary_sits_atop_flat_dorsal_dorsal_surface_of_surangular_T_shaped_surangular_of_L, 512 Surangular_anterior_extent_in_dentary_kinetic_notch/to_no_more_than_four_tooth_positions_from_end_of_tooth_row to_at_least_six_tooth_positions_from_end_of_tooth_row to_at_least_nine_tooth_positions_from_end_of_dentary, 513 397._Surangular_external_foramina/two_foramina_anterior_and_posterior single_foramen, 514 Surangular_anterior_surangular_foramen_size_183_Longrich/small large, 515 399._Surangular_adductor_fossa_on_external_face_of_mandible/shallow_and_extends_ventrally_no_more_than_halfway_down deep_and_extends_ventrally_more_than_half_way_down_nearly_to_angular_bone, 516 Surangular_adductor_fossa_extent_posteriorly_219_L/large_shallow_depression_broadly_separates_deep_part_of_adductor_fossa_from_rim_of_mandibular_cotyle adductor_fossa_extends_posteriorly_to_near_the_mandibular_cotyle, 517 Surangular_distinct_crest_marks_edge_of_lateral_jaw_adductor_especially_caudally_220_L/absent present, 518 400._Surangular_dorsal_margin/nearly_horizontal_rising_somewhat_toward_the_coronoid_anterodorsal_edge_set_below_level_of_tooth_crowns rises_steeply_anterodorsally_to_coronoid_with_apex_reaching_above_level_of_tooth_crowns, 519 401._Prearticular_and_surangular_fused_in_adult/separate fused, 520 402._Prearticular_broadly_contacts_surangular_behind_posteromedial_process_of_coronoid_restricting_mandibular_adductor_fossa_anteriorly/absent present, 521 398_Prearticular_margin_on_border_of_adductor_fossa_/medial_wall_of_adductor_fossa_no_higher_than_lower_half_of_glenoid_fossa prearticular_wall_reaches_to_at_least_top_of_glenoid_fossa prearticular_ala_arched_margin_rises_well_above_glenoid_buttress, 522 Prearticular_fossa/absent present, 523 Prearticular_tubercle/absent present, 524 403._Prearticular_crest/absent present, 525 Mandibular_cotyle_shape_230_L_in_part/relatively_flat deep_and_arched_transversely, 526 404a_Retroarticular_process_length/knob_like_ZS subequal_to_mandibular_cotyle_length longer_than_mandibular_cotyle_length, 527 404b_Retroarticular_process_length_amphisbaenians/much_longer_than_mandibular_cotyle_is_wide_at_midpoint shorter_than_cotyle_width absent, 528 404c_Retroarticular_process_very_long/more_or_less_prominent more_than_twice_as_long_as_mandibular_cotyle_length nearly_10x_as_long_as_mandibular_cotyle_length, 529 405._Retroarticular_process_orientation_in_situ/extends_posteriorly inflected_medially, 530 406._Retroarticular_process_orientation_in_lateral_or_posterior_view/extends_posteriorly inflected_ventrally, 531 407._Retroarticular_process_dorsal_edge/horizontal inclined_posterodorsally, 532 408._Retroarticular_process_emarginate_distally/absent present, 533 Retroarticular_process_rotation_/both_margins_of_retroarticular_process_on_same_plane rotated_about_long_axis_so_inner_edge_is_lower_than_outer_edge, 534 409._Retroarticular_process_lateral_notch_forming_waist_proximally/absent present, 535 410._Retroarticular_process_breadth_greatest_width_relative_to_mandibular_condyle_glenoid/narrower wider, 536 411.__Retroarticular_process_prearticular_pterygoideus_process_angular_process_of_Oelrich_1956/absent present, 537 Retroarticular_process_pterygoideus_process_shape/narrow_based crest_connects_process_to_tip_, 538 412._Premaxillary_teeth_apart_from_median_tooth/similar_size_or_larger_than_anterior_maxillary_teeth distinctly_smaller_than_anterior_maxillary_teeth, 539 413._Median_premaxillary_tooth/absent present, 540 414._Enlarged_median_tooth_on_fused_premaxilla/median_tooth_same_size_as_other_premaxillary_teeth slightly_enlarged_median_premaxillary_tooth greatly_enlarged_median_premaxillary_tooth, 541 415._Maxillary_tooth_row_extent_posteriorly/to_roughly_midorbit_or_anterior to_posterior_third_of_orbit posterior_to_orbit, 542 416._Maxillary_tooth_crown_height/constant_throughout_tooth_row sinuous_occlusal_surface convex_occlusal_surface length_decreases_posteriorly length_increases_posteriorly, 543 417._Maxilla_enlarged_teeth_fangs_relative_to_adjacent_teeth/absent present_on_anterior_maxilla present_on_posterior_maxilla, 544 LBG_159_Dentary_teeth_conspicuously_enlarged_anteriorly/absent present caniniform_dentary_tooth_one_or_two, 545 418._Maxilla_tooth_row_length/to_or_behind_midorbit anterior_to_midorbit anterior_to_orbit, 546 419._Premaxillary_tooth_count/none one_to_three four_to_six seven_to_nine 10_or_more, 547 Premaxilla_teeth_absent_over_most_of_snout_tip_teeth_at_lateral_margins_of_element_4_ZS/absent_premaxilla_bears_full_set_of_teeth_or_is_edentulous present, 548 420._Maxillary_tooth_count/5_Feb 15_Jun 16_27 31_or_more, 549 421._Dentary_tooth_count/0 9_Apr 20_Oct 21_35 36_or_more, 550 422._Marginal_teeth/all_vertical all_recurved anterior_teeth_recurved_and_posterior_teeth_vertical, 551 Dentary_tooth_orientation/dorsal dorsolateral, 552 Tooth_crown_sharp_flexure_just_distal_to_parapet_of_jaw_3_ZS/absent_includes_simple_recurve sharp_flexure_of_tooth_shaft_just_above_jaw_parapet_at_least_in_some_teeth sharp_flexure_near_crown, 553 Tooth_crowns_with_long_slender_needle_like_tips_3_ZS/absent present, 554 423._Position_of_marginal_teeth_relative_to_tooth_bearing_element/on_medial_side_of_tooth_bearing_element near_to_or_on_apical_margin_of_tooth_bearing_element, 555 424._Fusion_of_marginal_teeth/unfused_to_each_other fused_to_each_other, 556 Loose_tooth_attachment_158_L/teeth_anklyosed_to_tooth_bearing_elements_at_tooth_maturity nearly_all_mature_teeth_fail_to_anklylose_held_in_place_by_fibrous_connective_tissue_leaving_conspicuous_gap_around_tooth_bases, 557 425._Bases_of_marginal_teeth_infolding/smooth_dentine_and_enamel_not_infolded dentine_and_enamel_infolded_into_pulp_cavity_resulting_in_longitudinal_grooves_externally_at_base_of_teeth, 558 426._Bases_of_marginal_teeth_expanded/absent present, 559 427._Marginal_tooth_spacing/crowns_closely_spaced crowns_separated_by_large_gaps, 560 428._Position_of_replacement_teeth/lingual posterolingual, 561 tooth_replacement_number_of_replacment_generations_per_tooth_position_157_L/single_replacement_tooth_per_tooth_position two_replacement_teeth_per_tooth_position, 562 tooth_replacement_number_of_tooth_positions_with_replacement_teeth/no_more_than_half_of_tooth_positions_with_replacement_teeth nearly_all_tooth_positions_with_replacment_teeth, 563 Teeth_interdental_ridges_separate_tooth_sockets_155_Longrich/absent interdental_ridges_present_separating_tooth_sockets_but_socket_still_open_lingually deep_thecae_prominent_interdental_ridges_completely_enclose_tooth_sockets, 564 429._Orientation_of_replacement_teeth/erupt_upright_growing_straight_upwards_into_functional_position erupt_horizontally_and_then_rotate_through_90_degrees_about_the_base_into_functional_position, 565 430._Tooth_replacement/present absent, 566 431._Resorption_pits/present absent, 567 432._Development_of_resorption_pits/at_base_of_teeth on_bony_tooth_pedicel, 568 Tooth_alveolus_shape__5_ZS/wider_transversley_than_anteroposteriorly nearly_circular, 569 Dentary_tooth_bearing_border_termination_relative_to_anterior_surangular_foramen/tooth_bearing_border_approaches_vicinity_ant_sur_for_to_variable_degree tooth_bearing_border_broadly_separated_from_ant_sur_for_by_distance_roughly_equivalent_to_tooth_row_length, 570 433._Palatal_teeth/constant_in_size_across_palatal_tooth_row decrease_in_size_posteriorly, 571 Palatal_teeth_relative_size_at_palatine_pterygoid_transition/palatine_teeth_larger_than_adjacent_pterygoid_teeth pterygoid_teeth_larger_than_adjacent_palatine_teeth, 572 Diastema_between_palatine_and_pterygoid_tooth_rows/absent present, 573 434._Cusps_on_posterior_teeth/unicuspid bicuspid tricuspid, 574 435._Venom_groove_on_anteromedial_surface_of_teeth/absent present_unenclosed present_enclosed_tube, 575 436._V_shaped_wear_facets_of_maxillary_teeth_incised_on_lateral_face_of_dentary_between_dentary_teeth/absent present, 576 437._Teeth_swollen_set_off_from_tooth_shafts_above_jaw_parapet/absent present, 577 438._Basihyal/present absent, 578 439._Basihyal_relationship_to_skull_when_mouth_is_closed/anterior_to_braincase ventral_to_braincase posterior_to_braincase, 579 440._Hyoid_lingual_process_length/short medium long, 580 441._Hyoid_distal_part_of_lingual_process/not_detached detached, 581 442._Free_epibranchials_second_epibranchial/absent present, 582 443._Free_epibranchial/simple complex_has_hooks_or_processes_and_or_doubles_back_on_itself, 583 444._First_epibranchial/shorter_than_first_ceratobranchial longer_than_or_nearly_equal_to_first_ceratobranchial, 584 445._First_ceratobranchial_in_lateral_view/no_dorsolateral_angulation weak_dorsolateral_angulation_has_a_distinct_bend strong_dorsolateral_angulation_90_degrees_or_more entire_element_straight_or_oriented_vertically, 585 446._Second_ceratobranchials/present absent, 586 447._Second_ceratobranchial/shorter_than_first_ceratobranchial nearly_equal_to_or_longer_than_first_ceratobranchial, 587 448._Second_ceratobranchial_apposed_on_midline/absent present, 588 449._Large_wing_like_hyoid_cornu/absent present, 589 450.Hyoid_cornu/less_than_the_length_of_the_epihyal greater_than_or_equal_to_the_length_of_the_epihyal, 590 451._Epihyal/meets_hyoid_cornu_at_or_near_its_distal_end meets_hyoid_cornu_along_its_body, 591 452._Epihyal/expansion_or_elaboration_at_proximal_end_absent simple_expansion_at_proximal_end_present hook_like_elaboration_at_proximal_end_present lateral_flange_at_proximal_end_present medial_flange_at_proximal_end_present, 592 453._Lateral_flange_at_midpoint_of_epihyal/absent present, 593 454._Presacral_vertebrae_number_reduction/24_or_more_presacrals 23_presacrals fewer_than_23_presacrals, 594 455._Presacral_vertebrae_number_increase_I/24_or_fewer 25 26 28_or_more, 595 456._Presacral_vertebrae_number_increase_II/32_presacrals_or_fewer 33_to_39 89_or_more, 596 457._Presacral_vertebrae_number_increase_III/less_than_104 144_to_156 168_to_180 184_or_more, 597 458._Presacral_vertebrae_number_increase_IV/less_than_193 197_to_209 more_than_219, 598 459._Cervical_vertebra_number_reduction/six_or_more five three two, 599 460._Cervical_vertebrae_number_increase/six_or_fewer seven eight_or_more, 600 Axial_intercentrum_fused_to_axis_centrum_in_adult_ZS_2012/absent_not_scored_in_non_snakes_with_braincase_elements_unfused_and_odontoid_fused_to_axial_centrum_equal_to_adult present_who_knows_if_they_are_full_grown, 601 461._Cervical_intercentrum_position/intercentral posterior_end_of_preceding_centrum anterior_end_of_following_centrum absent, 602 462._Cervical_rib_ossified_portion_shape/widens_distally_at_least_in_last_cervical tapers_distally, 603 463._Cervical_ribs_start_on_vertebra_number/three four five six, 604 464._Cervical_intercentrum_length_relative_to_pedicle_length/intercentrum_longer_than_pedicle intercentrum_shorter_than_pedicle, 605 465._Cervical_pedicle_outgrowth_of_pleurocentrum_to_which_intercentrum_may_attach/absent projecting_ventrally_with_discrete_fore_and_aft_margins, 606 466._Vertebral_pedicle_posterior_extent/in_anterior_half_of_vertebral_column throughout_vertebral_column, 607 Vertebral_anterior_pedicle_relative_length_232_L/about_50%_of_centrum_length subequal_to_or_longer_than_centrum_length, 608 467._Vertebral_centrum_articulation/amphicoelous_and_notochordal procoelous, 609 468._Zygosphene_zygantrum_accessory_intervertebral_articulations/absent dorsolaterally_directed_facet_continuous_with_prezygapophyseal_articulation_located_just_up_edge_of_neural_arch tall_laterally_directed_facet_continuous_with_prezygapophyseal_articulation_and_extending_as_high_as_top_as_neural_canal separate_facet_set_on_distinct_pedicle_and_facing_ventrolaterally with_nearly_transverse_cranial_margin_of_zygosphene, 610 neural_spine_well_developed_125_Z&S/prominent reduced_or_absent, 611 Vertebrae_anterior_neural_spine_shape/anterior_trunk_vertebral_neural_spines_undifferentiated_from_those_more_posteriorly very_long_anteroposteriorly_narrow_and_posterodorsally_directed_neural_spines_present, 612 Vertebrae_arqual_ridges_234_Longrich/absent present, 613 Vertebrae_centrum_shape_in_ventral_view_235_Longrich/narrowly_subtriangular broadly_subtriangular, 614 Vertebrae_posterior_margin_of_the_neural_arch_with_a_deep_V_shaped_embayment_in_dorsal_view_exposing_much_of_the_centrum_in_front_of_the_condyle_126_Z&S/absent present, 615 Vertebrae_paracotylar_foramina_well_developed_and_consistently_distributed_throughout_vertebral_column_122_ZS_2012/absent present, 616 Vertebrae_prezygapophyseal_accessory_processes_119_ZS_2012/absent present, 617 Vertebrae_parazygantral_foramina_present_128_Z&S/absent present, 618 Vertebral_synapophyses_are_at_the_same_level_as_or_slightly_more_projected_laterally_than_the_lateral_edge_of_the_prezygapophyses_132_Z&S/absent present, 619 Vertebral_synapophysis_shape_118_ZS_2012/undivided_more_or_less_dorsoventrally_elongate_convexity divided_hemispherical_oval_facet_dorsally_for_primary_rib_articulation_diapophysis_and_flatter_inset_facet_ventrally_for_rib_accessory_process_articulation_parapophysis, 620 Vertebrae_subcentral_paralymphatic_fossa_120_ZS_2012/absent present, 621 Vertebrae_condyle_delimitation_237_L/condyle_confluent_with_the_centrumn_ventrally condyle_distinctly_separated_from_centrum_by_a_groove_at_base_of_centrum_and_a_raised_rim_about_cranial_edge_of_condyle, 622 469._Vertebrae_mid_dorsals_are_pachyostotic_133_ZS_2012/absent present, 623 Sacral_rib_attachment_on_ilium_relative_to_acetabulum/1st_sacral_rib_overlaps_acetabulum or_is_entirely_posterior_to_level_of_acetabulum, 624 Sacral_vertebrae_131_ZS_2012/present absent, 625 Lymphapophyses_presence_129_ZS_2012/absent present, 626 Lymphapophyses_number_130_ZS_2012/three_lymphapophyses_and_one_forked_rib more_than_three_lymphapophyses_and_one_forked_rib, 627 470._Caudal_autotomic_septum_position_relative_to_caudal_rib/within_caudal_rib anterior_to_caudal_rib posterior_to_caudal_rib absent, 628 471._Caudal_rib_transverse_process_shape/single_rib_without_basal_foramen foramen_passing_through_base_of_rib divergent_bifid_ribs_on_some_caudals, 629 472._Posterior_caudal_vertebrae_groove_on_dorsal_surface_of_neural_spines/absent present, 630 473._Caudal_vertebrae_pterapophysis/absent present, 631 474._Caudal_vertebrae_distal_tip_of_anterior_zygapophyses/undifferentiated elaborated_into_a_horizontal_blade, 632 475._Caudal_haemal_arch_intercentrum_position/intercentral_pedicles_feeble_absent contacting_mainly_condyle_but_also_distinct_pedicles_beneath_preceding_centrum mainly_contacting_pedicles_on_preceding_centrum_but_still_bordering_condyle well_forward_of_condyle_on_preceding_centrum, 633 476._Caudal_haemal_arch_pedicle_length/short long, 634 477._Vertebra_whose_rib_first_attaches_to_sternum/seventh_or_more_anteriorly eighth ninth, 635 478._Trunk_ribs_pachyostotic/slender_cancellous_ribs thick_dense_ribs, 636 479._Postcloacal_bones/absent present, 637 480._Sternum/present absent, 638 481._Sternal_fontanelle/absent present, 639 482._Sternal_fontanelle_number/single double, 640 483._Number_of_rib_attachment_points_to_sternum_including_attachment_of_xiphisternum/five four three two_or_fewer, 641 484._Xiphisternun/present absent, 642 485._Xiphisternal_fontanelle/absent present, 643 486._Number_of_xiphisternal_rib_attachment_points/one two three four, 644 487._Number_of_postxiphisternal_or_poststernal_inscriptional_ribs_united_along_the_ventral_midline_to_form_continuous_chevron_shaped_structures/0 4_Jan 11_May 30_Dec >31, 645 488._Scapulocoracoid/large reduced absent, 646 489._Scapula/short_and_wide elongate_and_narrow, 647 490._Suprascapular_cartilage/present absent, 648 491._Suprascapula/large small, 649 492._Scapula_emargination_on_anterodorsal_edge_scapular_fenestra/absent present, 650 493._Scapulocoracoid_emargination/absent present, 651 494._Scapulocoracoid_emargination/closed_by_cartilage open closed_by_scapula_and_coracoid, 652 495._Coracoid_anterior_primary_emargination_fenestra/absent present, 653 496._Coracoid_posterior_secondary_emargination_fenestra/absent present, 654 497._Coracoid_size/enlarged_extending_anteriorly_to_level_of_clavicles not_enlarged_not_extending_anteriorly_to_level_of_clavicles, 655 498._Epicoracoid_cartilage_extent/contacts_mesoscapula_and_suprascapula does_not_contact_mesoscapula_and_suprascapula, 656 499._Clavicle/present absent, 657 500._Clavicle/no_notch_or_fenestration_present notch_present fenestration_present, 658 501._Clavicle/rod_like greatly_expanded_proximally, 659 502._Clavicular_angulation/simple_curved_rod_following_contour_of_scapulocoracoid strongly_angulated_curving_anteriorly_away_from_scapulocoracoid, 660 503._Distal_clavicle_articulation/with_scapula with_suprascapula no_distal_articulation, 661 504._Clavicles_medial_contact/clavicles_do_not_meet_on_midline clavicles_meet_on_midline, 662 505._Interclavicle/present absent, 663 506._Interclavicle_lateral_process/present absent, 664 507._Interclavicle_anterior_process_extending_beyond_lateral_process/absent present, 665 508._Interclavicle_anterior_process_length_as_ratio_of_interclavicle_length/0.01_0.20 more_than_0.20, 666 509._Interclavicle_anterior_end/ventral_to_clavicles dorsal_to_clavicles abuts_clavicles lies_posterior_to_clavicles, 667 510._Pubis/present absent, 668 511._Pubis_symphyseal_process_orientation_in_ventral_view/medially_directed anteromedially_directed, 669 512._Pubis_symphyseal_process/thick thin, 670 513._Pubis_symphyseal_process/expanded_distally tapered_not_expanded_distally, 671 514._Pectineal_pubic_tubercle/closer_to_acetabulum_than_to_symphysis closer_to_symphysis_than_to_acetabulum_or_equal_distance, 672 515._Pubis_tubercle_orientation_in_ventral_view/anteriorly_directed ventrally_directed, 673 516._Ischium/present absent, 674 517._Ischial_tubercle/present absent_or_continuous_with_hypoischial_cartilage, 675 518._Hypoischium/well_developed_expanded_at_distal_end vestigial_no_expansion_at_distal_end absent, 676 519__Hypoischial_foramen/absent present, 677 520._Ilium/present absent, 678 521._Ilium_tubercle/present absent, 679 522._Ilium_blade_orientation/slopes_posterodorsally oriented_vertically oriented_anteriorly, 680 523._Ilium_dorsal_ends_blades/not_compressed_laterally_and_do_not_expand_or_converge_dorsomedially compressed_laterally_suprailiac_cartilages_expanded_into_triangular_plates_that_converge_dorsomedially, 681 524._Pelvic_elements_ilium_ischium_pubis/in_close_sutural_contact_throughout_postnatal_ontogeny_and_co_ossified_into_a_single_pelvic_bone_late_in_postnatal_ontogeny distinct_elements_weakly_united_in_non_sutural_contacts, 682 525._Hyperischium/present absent, 683 526._Hyperischial_foramen/absent present, 684 527._Epiphyses_on_long_bones_with_separate_ossification_centers/present absent, 685 528._Proximal_forelimb_long_bones_humerus_radius_and_ulna/present absent, 686 529._Ratio_of_radius/ulna_to_humerus 0.62_0.97 0.98_1.10, 687 530._Ectepicondylar_foramen/present absent, 688 531._Ulnar_patella/present absent, 689 532._Ulna_olecranon_process_on_proximal_epiphysis/prominent short_or_absent, 690 533._Unla_enlarged_distal_epiphysis_that_is_nearly_hemispherical_in_profile_and_fits_into_a_concomitantly_enlarged_depression_on_the_ulnare/absent present, 691 534._Radius_styloid_process/absent present_on_posterolateral_surface_of_distal_epiphysis, 692 535._Carpal_intermedium/large medium_small small tiny absent, 693 536._Ball_and_socket_joints_in_wrist_and_ankle/absent present_formed_by_large_central_carpal_or_lateral_centrale_ball_and_radiale_ulnare_and_pisiform_socket_and_by_distal_tarsal_4_ball_and_astragalocalcaneum_socket, 694 537._Lateral_centrale_in_hand/separated_from_second_distal_carpal contacting_second_distal_carpal, 695 538._Proximal_end_of_first_metacarpal/separated_from_medial_centrale contacting_medial_centrale, 696 539._Palmar_sesamoid/absent present, 697 540._Metacarpals_and_metatarsals_IIÐIV/longer_than_proximal_phalanges shorter_than_proximal_phalanges, 698 541._Metacarpals_sesamoids_ventral_to_distal_heads/absent present, 699 542._Phalangeal_count_reduction_in_manus_digits_IIDIV/three_four_five reduced_to_three_in_digits_III_and_IV reduced_to_four_in_digit_IV reduced_to_three_in_digit_III_and_four_in_digit_IV, 700 543._Phalangeal_count_digit_V_of_manus/three two four, 701 544._Hyperphalangy_in_manus/absent present_in_more_than_one_digit present_only_in_digit_1 present_only_in_digit_5, 702 545._Opposing_digits/digits_nonopposing digits_1_2_and_3_opposing_digits_4_and_5_in_manus_and_digits_1_and_2_opposing_digits_3_4_and_5_in_pes, 703 546._Penultimate_phalanges_in_hand/shorter_than_or_equal_to_antepenultimate longer_than_antepenultimate, 704 547._Sesamoids_dorsal_to_distal_heads_of_penultimate_phalanges_manus/present absent, 705 548._Femur/present absent, 706 549._Femur/curved_in_dorsoventral_plane not_curved_in_dorsoventral_plane, 707 550._Femur_internal_trochanter/well_developed_as_a_prominent_distinct_head poorly_developed_or_absent, 708 551._Tibial_patella/present absent, 709 552._Tibial_lunula/present absent, 710 553._Fibular_lunula/present absent, 711 554._Dorsal_and_ventral_tibiofemoral_lunulae/both_present_and_separate ventral_present_dorsal_absent both_absent dorsal_present_ventral_absent, 712 555._Tibia_notching_of_distal_epiphysis/notch_not_present_epiphysis_gently_convex_for_astragalocalcaneal_articulation distinct_notch_present_fitting_onto_a_ridge_on_the_astragalocalcaneum, 713 556._Fibulo_astragalar_joint/occupies_less_than_half_of_distal_end_of_fibula involves_most_of_distal_end_of_fibula, 714 557._Tibia_and_fibula/remain_widely_separated_at_distal_ends very_close_or_in_contact_at_distal_ends, 715 559._Third_distal_tarsal/present absent, 716 560._Second_distal_tarsal/present absent, 717 561._Astragalus_and_calcaneum/fused_with_no_suture_visible_in_adult co_ossified_with_suture_visible, 718 562._Sesamoid_between_metatarsal_I_and_astragalocalcaneum_ventrally/present absent, 719 564._Metatarsal_V/hooked broad_proximally_but_not_hooked, 720 565._Metatarsals_sesamoids_ventral_to_distal_heads/absent present, 721 566._Phalangeal_counts_reduction_in_pes/two_three_four_five_four reduced_to_three_phalanges_in_digits_III_IV_and_V reduced_to_four_phalanges_in_digit_IV_and_three_phalanges_in_digit_V reduced_to_three_phalanges_in_digit_V, 722 567._Hyperphalangy_in_digits_of_pes/absent present_in_more_than_one_digit present_only_in_digit_V, 723 569._Sesamoids_dorsal_to_distal_heads_of_penultimate_phalanges/present absent, 724 570._Osteoderms_on_body_and/or_tail not_imbricate imbricate_with_gliding_surface_anteriorly imbricate_anteroposteriorly_but_interdigitate_laterally, 725 NEW_Imbricate_body_osteoderm_overlap_pattern/overalp_primarily_anteroposteriorly_slightly_laterally anteroposteriorly_and_deeply_laterally, 726 571._Osteoderm_ornamentation/vermiculate_or_smooth tuberculate, 727 572._Dermal_skull_bone_ornamentation/smooth lightly_rugose_about_frontoparietal_suture present_over_dorsum present_on_jugal_postorbital_bar, 728 573._Palpebral_osteoderm_below_supraorbital_scales_and_their_osteoderms/absent present, 729 574._Supracilliary_osteoderm_pierced_vertically_by_foramina/absent present, 730 Supracilliary_osteoderm_contacts_parietal/present absent, 731 575._Osteoderms_inside_supraorbital_scales/absent single compound, 732 576._Supraorbital_osteoderms_insert_into_sulcus_along_frontal_supraorbital_margin/absent present, 733 577._Osteoderms_in_cheek_scales/absent single compound, 734 578._osteoderms_in_gular_scales/absent single compound, 735 579._Osteoderms_in_dorsal_scales/absent single compound, 736 580._Osteoderms_in_ventral_scales/absent single compound, 737 581._Osteoderms_in_skull_roof_scales/single compound, 738 582._Osteoderms_invest_imbricate_caudal_scales/absent present, 739 583._Mineralized_cranial_scales_hinges/absent present, 740 584_Scleral_ossicle_count/16_or_more 14_15 13_Dec 11_or_fewer, 741 585._Scleral_ossicles/complex_and_irregular_in_shape square_or_rectangular_in_shape, 742 586._Interorbital_septum/present absent, 743 587._Statolithic_masses/absent present, 744 588._Calcified_endolymph/absent present_but_confined_to_occiput present_extends_posteriorly_into_neck, 745 589._Foretongue_retracts_into_hind_tongue/absent present tongue_can_be_retracted_entirely_into_buccal_cavity_below_larynx, 746 590._Tongue_tip_notching_as_percentage_of_tongue_length/no_notch less_than_10% 10_20% 20_40% more_than_45%, 747 591._Tongue_papilla_crenellated/continuous_smooth_distal_edges_of_papilla crenellated_distal_edge, 748 592._Tongue_papilla_shape/long_filamentous_and_densely_packed_papilla shorter_larger_somewhat_compressed_and_tipped_caudally_scale_like_papilla deeply_imbricate_flat_scales, 749 593._Hindtongue_epithelium/discrete_papilla_filamentous_or_scale_like transverse_plicae_confined_to_lateral_margins_of_posterior_lobes transverse_plicae_extend_across_hindtongue and_into_the_anterior_half_of_the_tongue, 750 594._Infralingual_folds/absent present, 751 595._Papilla_on_ventrolateral_margins_of_entire_tongue/papillose plicate_transverse_scale_rows, 752 596._Tongue_papilla_arrangement/not_in_oblique_rows arranged_in_regular_oblique_rows, 753 597._Hypoglossal_muscle/paired_and_smooth_ventrally multiple_and_with_fine_transverse_grooves_beneath_each_muscle_bundle, 754 598._Facial_tongue_wiping_tongue_acts_as_an_accessory_eyelid/absent present, 755 599._Foretongue_surface/papillose smooth, 756 600._Foretongue_filamentous_epithelium_anterior_extent/extends_to_tongue_tip_as_long_filaments those_overlying_chemosensory_part_of_tongue_are_depressed_to_varying_degree, 757 601._Arrowhead_tongue_tip/tongue_lateral_margins_continuous_at_tip notched_just_behind_tip, 758 602._Tongue_width_across_posterior_notch/maximum_tongue_length 50_to_60% 40_to_44% 30_to_35% 22_to_25% less_than_12%, 759 603._Hind_tongue_papilla/not_sharply_pointed sharply_pointed, 760 604._Prey_prehension/crickets_or_larger_animals_taken_primarily_with_tongue primarily_with_jaws, 761 605._Amniote_penis/absent hemipenis_present, 762 606._Hemipenis_mineralizations/absent comb_like sleeve_like spine_like, 763 607._Rectus_abdominis_muscles/not_attached_to_belly_skin attached_to_hinges_between_ventral_transverse_scale_rows, 764 608._Ulnar_nerve_pathway/superficial_to_limb_muscles deep_to_limb_muscles, 765 609._Dorsal_shank_muscle_innervation/peroneal_nerve interosseous_nerve, 766 610._Ovipary_vs._ovovivipary/vivipary ovipary ovovivipary_to_vivipary, 767 Diel_Activity_Pattern/Diurnal Crepuscular Nocturnal, 768 Enlarged_rostral_scale/absent_undifferentiated present, 769 Rostral_scale/not_greatly_expanded_and_dominating_anterior_portion_of_head expanded_dorsally_onto_top_of_skull_posteriorly_and_laterally_dominating_anterior_portion_of_head, 770 Posterior_split_in_rostral_scale/absent present_division_along_posterior_margin_of_scale_near_midline, 771 External_narial_opening/enclosed_entirely_within_nasal_scale at_edge_of_nasal_scale, 772 External_narial_opening/separated_from_rostral partially_in_rostral, 773 External_narial_opening/separated_from_supralabial partially_in_supralabial, 774 Nasal_rostral_contact/absent_separated_by_scales present, 775 Contact_between_nasal_and_supralabial_scales/absent_separated_by_other_scales present, 776 Minimum_number_of_scales_separating_the_nasal_scales_medially/none_nasal_scales_contact_medially one_scale two three four_or_more_scale_rows, 777 Dorsal_cephalic_scales/relatively_small enlarged_larger_than_adjacent_neck_scales, 778 Dorsal_cephalic_scales/smooth some_or_all_keeled, 779 Head_scales_vertically_elongate/no yes_including_scales_associated_with_eye_and_nostril_extending_almost_from_mouth_to_top_of_skull, 780 Enlarged_frontal_scale_between_orbits/absent present, 781 Median_contact_of_frontoparietals/present absent_frontoparietals_reduced_and_separated_by_contact_of_frontal_and_interparietal, 782 Circumorbital_scales_distinct_semicircular_row_of_scales_bordering_orbital_region/absent present, 783 Enlarged_supraoculars/absent present_scales_over_eye_larger_than_surrounding_scales, 784 Supraoculars/two_or_more_rows_of_scales single_row_of_enlarged_scales_between_superciliary_and_frontal, 785 Single_enlarged_supraocular_scale_row_between_orbit_laterally_and_frontal_medially/no yes_supraciliary_scales_absent, 786 Median_contact_of_enlarged_supraoculars/absent present, 787 Supercilary_scales/non_overlapping overlapping, 788 Supralabial_scales/not_entering_orbit entering_orbit, 789 Enlarged_subocular_scale_elongate_scale_ventral_to_orbit/absent_or_series_of_smaller_scales present_single_scale_larger_than_surrounding_scales, 790 Subocular_supralabial_contact/absent_row_of_one_or_more_scales_between_scales_above_lip_supralabials_and_below_the_orbit_suborbitals present, 791 Enlarged_interparietal_scale/absent present_scale_distinctly_larger_than_surrounding_head_scales_present_over_parietal_region_of_skull, 792 Temporal_region_covered_almost_exclusively_by_pair_of_enlarged_temporal_scales/no yes, 793 Heat_sensing_pit_in_loreal_region/absent present, 794 Mouth/large_extending_posterior_to_eye greatly_reduced_posterior_terminus_at_or_anterior_to_level_of_eye, 795 Groove_allowing_tongue_to_be_extruded_when_mouth_is_closed/absent groove_present_in_rostral_sometimes_in_mental_also_but_too_difficult_to_score_consistently_as_a_separate_state, 796 Eye/visible_externally not_visible_externally, 797 Eye_surrounded_by_single_scale/no_multiple_scales single_scale, 798 Fleshy_eyelids/present absent, 799 Lower_eyelid_scales/homogeneous some_enlarged_scales, 800 Transparent_spectacle_in_lower_eyelid_scales/absent present, 801 Thick_granular_eyelid_covering_eye_except_for_small_opening_for_pupil_chamaeleon_condition/absent present, 802 External_ear_opening/present absent, 803 Tympanum/large_and_superficial small_and_inset, 804 External_ear_opening/entirely_or_mostly_uncovered partially_covered_by_fleshy_lobule partially_covered_by_scales_only_no_fleshy_lobule, 805 Complex_dewlap_apparatus_gular_fan_in_males/absent present_extensive_flap_of_skin_on_throat_usually_with_modified_scales, 806 Mental_scale/entire with_a_partial_split_at_the_posterior_end, 807 Elongate_postmentals/absent present, 808 Postmentals_scales_immediately_posterior_to_mental/two_enlarged_scales_sometimes_separated_by_additional_scales_or_more_scales_immediately_posterior_to_mental one_single_unpaired_scale_immediately_posterior_to_mental, 809 Enlarged_scales_medial_to_infralabials/present absent_scales_in_chin_more_or_less_homogeneous, 810 Infralabials_anteriormost_pairs/separate_medially one_row_contacting_medially_posterior_to_mental two_rows_contacting_medially, 811 Infralabial_and_supralabial_scales/not_greatly_expanded greatly_expanded_with_single_pair_of_sublabials_covering_most_of_chin_region_i.e._dibamids, 812 Mental_groove/absent present_a_distinct_infolding_of_skin_and_scales_along_the_anterior_midline_of_the_chin_region, 813 Gular_fold/present_complete incomplete absent, 814 Body_scales/not_arranged_in_non_overlapping_rings annulated_arranged_in_non_overlapping_rows, 815 Varanus_type_scale_on_dorsum_with_small_scale_surrounded_by_tiny_granular_scales/absent present, 816 Dorsal_scales/homogeneous_lacking_enlarged_scales heterogeneous_with_enlarged_scales_separated_by_smaller_scales_either_in_rows_or_scattered, 817 Dorsal_body_scales/small_granular_non_overlapping mucronate_pointed_overlapping cycloid_rounded_overlapping rectangular, 818 Dorsal_body_scales/all_smooth some_or_all_keeled, 819 Dorsals_with_longitudinal_ridges_in_addition_to_mid_dorsal_keels/absent_including_species_lacking_keels present, 820 Enlarged_middorsal_scale_row/middorsal_scales_same_size_as_surrounding_scales middorsal_scales_enlarged_relative_to_surrounding_scales_in_both_sexes sexually_dimorphic_mid_dorsals_enlarged_in_males, 821 Nuchal_crest_of_enlarged_scales/absent present_in_both_sexes sexually_dimorphic_mid_dorsals_enlarged_in_males, 822 Lateral_body_scales/granularnon_overlapping imbricate_overlapping, 823 Lateral_fold_along_side_of_body/absent present_often_associated_with_row_of_granular_scales_in_species_with_larger_scales, 824 Gastrosteges_enlarged_mid_ventral_scale_row_in_snakes/absent_multiple_scale_rows present_single_mid_ventral_scale_row_distinctly_larger_than_surrounding_scale_rows, 825 Ventrals/same_size_as_adjacent_laterals at_least_some_distinctly_larger_than_adjacent_laterals, 826 Ventral_body_scales/mostly_small_and_granular large_and_flat, 827 Ventral_scales/all smooth some_or_all_keeled, 828 Ventrals_posterior_edge/cycloid_mucronate_or_otherwise_rounded square_posterior_margin_more_or_less_straight, 829 Femoral_pores/absent present_in_both_sexes sexually_dimorphic, 830 Preanal_pores/absent present, 831 Tail_tip/pointed_tapered blunt_and_rounded, 832 Small_sharply_pointed_spike_at_posterior_tail_tip/absent present, 833 Tail_shape_cross_section/dorsoventrally_flattened_depressed rounded laterally_compressed, 834 Caudal_scales/approximately_same_size_as_dorsal_body_scales distinctly_larger_than_dorsal_body_scales, 835 Caudals_dorsal/smooth mostly_keeled, 836 Caudal_scales/not_arranged_in_non_overlapping_vertical_rows annulated_arranged_in_non_overlapping_vertical_rows, 837 Enlarged_preanal_scales/absent present_preanals_enlarged_relative_to_adjacent_ventrals, 838 Anal_plate/two_or_more_scales single_plate, 839 Enlarged_postanal_scales_males/absent present_some_scales_posterior_to_vent_greatly_enlarged_relative_to_adjacent_scales, 840 Lateral_postanal_tubercles/absent present_enlarged_scale_or_scales_on_medial_surface_of_anterior_end_of_tail, 841 Subcaudals_scales_on_ventral_mid_line_of_tail/divided_two_or_more_scale_rows some_single_some_divided all_single, 842 External_hindlimb/present absent_in_both_sexes sexually_dimorphic_present_in_males_absent_in_females, 843 External_hindlimbs/cylindrical flattened_and_flaplike, 844 Expanded_toe_pads/absent present, 845 Number_of_rows_of_subdigital_scales_along_mid_ventral_surface_of_digits_manus/one two_or_more_some_or_all_scales, 846 Keels_on_subdigital_scales_hand_longest_finger/absent present, 847 Digits_connected_in_groups_of_2_and_3_by_skin_chameleon_mittens/no yes, 848 Claws/not_covered_by_sheath_of_scales entirely_or_mostly_covered_by_sheath_of_scales;
	MATRIX
	Sphenodon_punctatus				000000?01?10000000?000000000000000000??00?000000??00?0?0??0000000000????00010000000000000000010000?1?00000??000000000??00?0100010??00?0??0??20010?0000000?0?00?0??0?1?0000??0??0?0000000010000000??0000?0001???????????00?0?100010000???00?01?000000??0000??0????00?????????010000??000?0000000000000?0??0??10??0??0000000?0?001000?0000??0????01??0?0000000?0000000???0?00000000000000000010?00????00???0??00?0?0?000???????????0?????000000????0000??00??0??0??100???0?0000000?0?40?2?000??200?00??1??????00?100?010000?00?0??1?0??10?0??0?0?0???????0??0?100?02012000010?00??????1???????00000010??01000000000100000?001?0??01????????????000??10???0?10000??????000000?000?000000000?000000000??010?0000000?0000000?0?0000?0000????000000?0?000???000?0?0000?000?01000000000000000000?000021001000040000?0000?000?000000000001??00011000000100011000110000002000000000001000
	Agama_agama						102000041?000?0000?001000?11100010000??00?100000??00?0?0200000001120????310000?0?020000?00100?0100?0100000??011010100??0201102000??00?1??2??30010?000?010?0?00?0??1?001000??0??0?0001000121000000??000000000000000?00001101?020010101???00?00?000001000000??0????010?????0?0000000??000?0000000000000?0??0??01??0??0010001?0?01?111?00000?1????11??000000000?0000100???0?0101??12100000010100000??0?00?0010000?0?00000???????????0?????0001010?0?0000??01?01010?0010???1?0000000?1030?20200??100?000?0?0????01?0010010000110?0??0?0??0000??0?2?1001000010?0?101?00022000010?000?????1???????001000100?00011000001000000?102?0??10????????????000??30???0?100011100100101011100100000000100000100001100000000000001140111000000100001010011010000000???100?0?0000?002001001000000?00?0?0010???001000000041100?1100010001000000000000000000000000011001100010001001110000000000100
	Agkistrodon_contortrix			100?1?01001??140010102111????0000?0?1112200?2?11010003?3??02110011?0111?1??????1???????????????10110??10000?2??1?0??212?0?0?????????1???0????????000??001100?102???11?002001?00?????????0?????111001???????00203110010?1??001302401030010011112100111100221010010011111211110??003113??12??0{0,1}??00?0???00??0?04101?1???12????1?0113110011010110??02000110?021?00?2?20110111??????0002201000????121110?02010??0111?112120100001???100000012???101?100002021102012110111?01?11110111011?2?0?0?11?101021201?1?1?012200?1??2??????21?11011?1?201012?010001000???????1?000211111000111112101?11011020001?00??01???????03210200311?1111400??0????1?10?1??3000021?001??????02??????????1?????1????1?????1???1???????1???????????????????1?????????????????????000?0?0000?00??11024???????01?04?11????101001001121001?01110?00?01101001???1??001001012000210001011100?0001010010021??????
	Anolis_carolinensis				100000?00000200000?001?00001000010000??00?110000??00?0?0?10000001120????01000000002000011000000100?1200000??011010000??0111302000??00?0??0??00000?0000010?0?00?0??0?000000??0??101012000001000000??000000000020000?00001101?020000100???00?00?000001000001?00????010?????0?0000000??000?0000000000000?0??0??01??0??0000001?0?01?101?00000?0????01?0000000000?0000010???0?01000112100000000100000??0?00?0?10000?0?00000???????????0?????0001010?0?000???01?01001?0010???1?000000??1?40?20000??100??2??000?10?1????2101202001200??0?0??0?00??0?2?0000000011010000?03023010000?0000???0000?????200000101?01011000000000000?012?0??12????????????010??20???101000{0,1}?{1,2}00{1,2}10100011101100001000{0,1}?{0,2}000100000100000000000001140111000000100000010011010000000???200?0?0000?0010011010000000000000010?01001000000041100?1100010011000000000001011000000200001002000111000001110001000010000
	Aspidoscelis_tigris				100000?00000000100?001000100000010000??00?100000??00?0?0200000002110????20?0?0?0?001000200011?0110?0003000??0111?0001??0001401100??00?0??0??00000?0003010?0?00?0??0?000000??0??010012000012?10000??000000010000000?00001111?010010120???00?00?0000011?1000??1??0?010?????0?0010111??102?0000000010100?0??0??02??0??0000003?0?01?101?10000?0????0010011110000?0001020???0?01001112100000001000000??0?00?1110000?0?00000???????????0?????0001110?0?0000??00?01000?0010???1?000000??1040?00001??000?000?010000101?021001102001200??0?1??0100??1?2?000000000?110000?13023010000?0000???0000?????100001111101000111000200000?011?0??13????????????000??02???0?100010100100000110110102101100101000111000100000010001101120111000000100000001110010100000???200?0?0000?00100100402010100010301101??00100000110100101100000111000000010000000010000000000000000110110001111100000000000
	Boa_constrictor					11001??00011?120010102011????001000?1002?1002?1101000213??01010012?011011??????1???????????????10001??10001?11?1?0??211?000?2??1??0201?0000030000?00??000120100201?01?001041?01????0??000?2???111001???????0020310?010?1??00130?201030000001112100111100120110011010??00001100?002012??02?000?000?0???001?00041011101012????1?01131100110100??1?020001002011100?2?2020?001??????000?202000????121111?01010??011211120100100010?0100001011???100?100011010102012110111001111010111011?100?0?21010100110111?010111012000100100?2111101111?200010?00??????0????23010002211111000111012101?1010000001???0??01???????03232?00310?1011400?1111011110?1113000021?001??????02??????????1?????1????0?1???0???0???????1???????????????????0?????????????????????000?0?0000?00??11024???????01?04?11?1??1{1,2}1001000040000?0000??00?00001001???1??000000012000200001011100?00010000100200?????
	Brookesia_brygooi				102000??1?000?0000?010010??1100000000??00?100000??00?0?0??1000002300?????????0?0?0?0000300100??100?0200011??00?0100?0???201000000??00?0??2??20000?000?220?2??1?0??1?1?1000??0??0?0001000112000000??0?00000000???00?10?01200?131000140???00?0??1?1???????????????????????????10000????00?00??000010000?0??0??11??0??0000001?0?01?111?0000??1?????1??000000000?00001?0???0?1??????2000020000010?00??1?10?0?10000?0?0?000???????????2?????0001010?1?000???00?01010?1010???1?0000000?0030?20200??100?00??1??0???0??0112010010?10?0??0?0??0100??0?0?0???????1?10?100?01022000010?000?????1???????201002200?031??011002000010?001?0??10????????????000??30?????00000?210?2110100?00111?????1????000010012?01110000001111141110101001010111012011010100101???300?0?0000?00?0012????????????????100??0000?0??0041100?0000?0000000000000011??0?0?0000200100000000001?00001110{0,1}00000000110
	Callopistes_maculatus			100000?00000000000?000000101000010000??00?100000??00?0?0200000002110????00?01000001100020001101110?1200000??0111?0000??0001301100??00?0?????00000?0003000?0?00?0??0?000000??0??010002000012?10000??000100110000000?00001111?010020110???00?01?000001101000??1??0?010?????0?0010101??102?0010000010100?0??0??02??0??0000003?0?01?101?10000?0????0010001110000?0001020???0?01001112100000001000000??0?00?1110000?0?00000???????????0?????0001110?0?0100??01?01000?0010???1?000000??1040?00001??000?000?030000001?011001102001100??0?1??0?00??1?2?000000000?110010?13013210000?0000???0000?????100001111001000111000100000?011?0??13????????????000??02???0?10001?101100000010110000001000100010111000000000010001101140111000000100000001110010100000???000?0?0000?00100100412011100010201101110010010{0,1}01310010110000000100000000000010001000{0,1}000000000000110{0,1}00001111000000001000
	Calotes_emma					102000041?00000000?001000?11100010000??00?100000??00?0?0200000001120????310000?0?020000300100?0100?0100000??011010100??02?1202000??00?1??2??30010?000?010?0?00?0????1?1000??0??0?0002000122000000??000000000000000?00001101?020000100???00?01?000001010000??0????010?????0?0200000??000?0000000020000?0??0??01??0??0010001?0?01?101?00000?1????11??000000000?0000100???0?0101??12100000010200000??0?00?0010000?0?00000???????????0?????0001010?1?0100??01?01010?0010???1?0000000?1040?20200??100?000?0000???01?0012010000110?0??0?1??0100??0?2?1001000010110101?01022000010?000?????1???????001000100?01011000001000000?102?0??10????????????000??30?????10001120020010101110110000010010{1,2}00011000010000000000000114011100000010000{0,1}010011010000000???100?0?0000?0020010??????0????????0100??001000000141100?0100010001000000000000000000000200011011100011000001110000000000100
	Celestus_enneagrammus			1000010101000201000000?00100000000000??00?010400??00?0?0?20000002120????00000000100100110001100102?0010000??011000010??00013011000?00?0??00?00000?000100000?00?0??0?010000??0??120002000011000000??0111002?0100100?000011110010010130???00?00?000001101000??1??0?210?????0?0010101??101?0010010000020?0??0??020?0??010001200?01?111?00000?0?????000001010000?00010200??0000000012100000001000000000000?0111000?0?00000????????0??0?????0001011?0?010?1000?01000?0010???100000000?1040?00112?00000100?0300100010021001002001102??0?0?00100??002?011001010?010000003012010000000010000000?0???1000011010011??000110310000?201????1000000????0?0010??10???2?10001110010000011{0,1}10010001110011101110100000100000000010111011100200010000000011001{0,1}100200110210?1111110101000012???????0??????100??10100000112100110110000111000000010001000010000200020100100010000001000100000000001
	Chamaeleo_sp.					102000031?0???0000?000010??1100010000??00?100000??00?0?0??10000023?0?????????0?0?0?0000300100??100?12?0011??2??1?00?0??02?1000000??00?0??2??20000?000?220?0??1?0??1?1?1000??0??0?1002000002000000??0?00000000???00?10?01200?1310?0?10???00?00?101???????????????????????????10000????00?000?000010000?0??0??11??0??0000001?0?01?111?0000??1?????1??000000000?0000100???0?1??????2?00020000100000??1?00???11000?0?0?000???????????2?????0001010?1?0011??0??01010?1010???1?0000000?0030?2?200??100?00??1??????01?010?010010?10????0?0??0?00??0?0?0???????0?1??100?00022000010?000?????1???????20100220{0,1}?031??0????2000020?001?0??10????????????000??30?????00000?300{2,3}2110100?00111?????1????000010012?011101?0011111141??01020010101?1???011110?00201???100?0?0000?0030010????????????????10???0000?100?041000?0000?000?000000000011??1?00?00020000001100000000000200000000000?010
	Coleonyx_variegatus				100000?000000001000000?00000000010000??00?113100??0000?0200000001110?0??00?0?011????0??????????102?0010000??01?1?0000??0001301000??00?0??0??00001?0004000?0?00?1????020010??0??1?00010?2????01000??0??100??1???????????1?21?020040140???10?00?000001100001?01????110?????0?0010000??000?01?0000000010?0??0??03??0??0000002?1?01?131?00000?0?????1??001000000?00?2?20???0?0010?012000000001001100??0?00?000??00?0?00000???????????2?????0001010?0?0010??00?01100?0010???1?000000??2?40?00000??100??20?000???011???3101002001100??0?0??0?00??0?2?000000100?010000?14034000000?0000???0000?????0000001011010000102?0200000?001????11????????????010??20???0?10100?100100100012101002101100111000101002?010001?0000001140110010000100000000111010001000???000?0?0000?000?0100100100011010001100??021000000{0,1}20000?0000??00?0000000000001?00001000200000000000010001001100000100000000
	Colobosaura_modesta				100101010000120100?000?00121000010000??00?110200??00?0?0?20000000?00????000000?0010101010001100112?0100000??0111?0020??0001301100??00?2?????00000?0003000?0?00?1??0?030000??0??0?0001000011010000??001100210010000?00001111?010010110???00?00?000001101000??1??0?010?????0?0010101??102?0001000010000?0??0??02??0??000001301?11?111?00000?0????00??001010000?00?2?20???0?00000012100000001000000??0?00?1?11000?0?00000???????????1?????0001110?1??00???00?01000?0010???1?000000??2040?10000??100?000?020000101?023101002001200??0?1??0100??1?2?000000000?010000?04023010000?0000???0000?????1000021???020001110?0200000?101?0??13????????????010??02?????10001?1???????????11??0???????1??01????0???0??0???00????11?0???0???????0??????11?01??0???????200?0?0000?00?0?10041231110?01020?11????0100000111100100110000011000000011000000010000210011000100110000001011100000000001
	Cordylosaurus_subtessellatus	100000010000000000?001?00120000000000??00?000300??00?0?0300000001010????000000?000?102110001100102?0110202??11110000???0001401100??00?0?????00001?0003000?0?00?0??0?020000??0??020000000?11010000??0011102?0200200?00001101?0200?0130???00?00?000001101000??1??0?210?????0?0010101??100?0000000000000?0??0??02??0??0100003?1?11?131?00000?0?????000001110000?00?2?21???0?0100?012100010001000000??0?00??111000?0?00010???????????0?????0001010?0?0100??0??11000?0010???1?000000??2040?00010??100?000?010000001?011101002011102??0????0100??0?2?010000010?00?000?13023010000?0000???0000?????00000120??011?00001?0300000??01?0??1?????????????010??02?????10?0???????0??????1???0??????0???0?????0???0??00??00????11?0???0???????0??????11?01??0????100?10?1?2222010?0000011220110001000?101??001001011101001101100010?1000000011000200000000210031100010110110001111100000000100
	Cylindrophis_ruffus				11000??001100110000101011????001000100000000231100000121??010100?3?001001??????1???????????????10001??10000?01?1?2??201?000?1101110200?00???31000?00??000110100210001?001011?00?????????0?????111101???????0020100?00001?110130000101000011?101100111100021010011310??0000010100020120101?000?000?0300010?0004111000100003?00?00131000000000????010001002011100?2?2010?001??????0001101000????110010?00000??010101110100000010001?0000011???110?000010110102012012110?01?11011111011?000?1?11010100110011?010111012000000200?2101100011?100010?00???1??0????22000001211100000111012101?0010000001???0??01???????03230200310?1011410??001011110?11030000???001??????02??????????1?????1????0?1???0???0100????1???????????????????0?????????????????????000?0?0000?00??11024???????01?04?110???121000001101001?01110?10?00001001???1??000?01012000200001000100?0101000000001??????
	Elgaria_multicarinata			100000010000000000?000000100000000000??00?100400??00?0?0?10000002120????00001000100100010001100102?0100000??011000000??00013011000?00?0??20?00000?000300000?00?0??0?010000??0??120002000011000000??0111002?0000100?000011110010010130???00?00?000001101000??1??0?210?????0?0010101??101?0010010010020?0??0??020?0??010001200?01?111?00000?0?????000001010000?00010200??0?00000012100000001000000??0000?0111000?0?00000????????0??0?????0001011?0?010???00?01000?0010?0?10000000??1040?01102?00000100?03001000100212010020011020?001?00100??002?011001010?01?0000030230100000000{0,1}0000000?0???1000011010011??000010300000?00100??100000000000000100?010002010000?100100000011100100011100111011101000101000000000101120111000000100000000110010100000100210?1111110101001012000000000100111010000100000{0,1}1310011010000011100000001000?000000000200021000110010000001011000000000001
	Eublepharis_macularius			100000?00000000100?000?00010000000000??00?113100??0000?0200000001110?0??00?0?011????0??????????102?0000000??0111?0000??0001301000??00?0?????00000?0004000?0?00?1????020010??0??1000010?2????01000??001100210200200?00001121?020040130???10?00?000001100001?01????110?????0?0010000??000?01?0000000010?0??0??03??0??0000002?1?01?131?00000?0????01??001000000?00?2?20???0?0010?012000000001001100??0?00?000??00?2?00000???????????2?????0001010?0?0010??00?01100?0010???1?000000??2?40?00000??100??20?000???001?003101002001100??0?0??0?00??0?2?000000010?010000?14034000000?000000?0000?????000001101101000010200200000?001?0??11????????????010??20???0?10100?100100{0,1}00012100102{0,1}?110011000111{0,1}0010010001?0000001140110000000100000000111010000000???000?0?0000?0000010010010001101000110000021010001130000?0000?000?0000000000000000000000200100000000110001001000001000000000
	Heloderma_horridum				110000?0000000010000020101?0000000000??00?002400??0000?0??0000002110?0??00?020?1???1???????????102?0000000??0111?0000??0001?031000?00?0??00?00001?000120000?00?0??0?010000??2??120002000012100000??00?1??2?0021000?000011110010010120???00?00?000001111001101??00210?????0?0011001??101?0000000001020?0??0??130?0??0100001?1?01?131?00000?0?????1??001110000?01010200??0001001112100000001010000000000?0?11000?0?00010????????0??2?????0001011?0?010??000001003?0010???100100110?0041?0000??0000010100110101011001201002001110??0?0?00000??002?000001000?10002002301111000001111110001??0???0100011010011??000000310001?211?1?0100000000000000100?300002010000?11??0100001?001100011001??2000100000001000000000?1111011?0?000010000000?110010?0?0000?0200?10111000010010130001000001001110101021001000121000?0000??0010000000000001?00000001000100000000110100001101100000000000
	Heloderma_suspectum				100000?00000000100?0020101?0000000000??00?002400??0000?0??0000002110?0??00?020?1???1???????????102?0000000??0111?0000??0001?031000?00?0??00?00001?000120000?00?0??0?010000??1??120002000011100000??00????2?0021000?0000111100100?0130???00?00?000001111001101??00210?????0?0011001??101?0000000001020?0??0??130?0??0100001?1?01?131?00000?0?????1??001110000?01010200??0001001112100000001010000??0000?010??00?0?00010????????0??2?????0001011?0?010?100000100300010???100100110?0041?0000??0000010100110101011001201002001110??0?0?00?00??002?000001000?10002002301111000001111110001??0???010001101{0,1}011??000000310001?211?0??100000000000000100?300002010000?11??01000011001100011001??2000000000{0,1}010000?0000?0112011100000010000000?110011?000000?0200?1011100002001013000?000001001110101021001000121000?0000?00010000000010000000000001000100000000110100001101100000000000
	Lacerta_viridis					100000?00000000100?002?00111000000000??00?010400??00?0?0?10000002100????001002?0000100110000100112?0000000??111000000??0001401100??00?0??0??00010?0001000?0?00?0??0?000000??0??010002000011010000??000100110000100?00001101?010010120???00?00?000001101000??1??1?210?????0?0010101??102?0010000000000?0??0??02??0??1100003?0?01?111?00000?0?????000001110000?0000020???0?0100?012100000001000000??0?00?0111000?0?00000???????????0?????0001010?0?000???00?01000?0010???1?000000??2040?00000??100?000?030000101?011001102001200??0?0??0000??0?2?000000000?010000?03023010000?0000???0000?????100000101001000000300300000?001????11????????????010??00???001000101001001000111001021111001110110010000000000000000011201110{0,1}0000100000000110010000000???310?1010000001001003122011000102011010000100111110100100110001??000000001000000000000000001100010011011000111111{0,1}000000000
	Lanthanotus_borneensis			110000020000000000?0111101?1000010000??00?001300??00?0?0??0000001120?0??00?02001???1???????????100?0103000??0111?0000??0000?031011?00?1??00?000?1?000310000?00?0??0?010100??2??120012100012?00000??00?1002?0000000?000011110010020120???00?00?000001111002101??10310?????0?0010001??101?00000000010?0?0??0??020?0??0100013?1?000131?00000?0?????010001110000?01010200??0000001112100000001010?00000001?010??00?0?00011????????0??2?????0001011?0?11001?00001013?0010?0?100100110?0041?0000???0000101000101010110112010020111100?000?00?00??002?010000000?11?02002201211000001111010001??0???0000011010011??010010310001?2021100100000000000000100?300003120000?21??000000111011000110001?1000000000101000000000?0114011100200000000?00?1100111002000?0010?1011100003?010140?0??00?1?0111101100200?1????40100?0000?000?00000001???1??0?0?1001201100000000110000001010000000001000
	Leiolepis_belliana				102000030000000000?000000011100010000??00?100000??00?0?0200000001120????310000?0?020000110020?0100?0000000??011010000??0201202000??00?0??2??10000?000?010?0?00?0??1?000000??0??000112000022000000??000000000000000?00001101?010010100???00?00?000001000001?00????010?????0?0100000??000?0000000000000?0??0??01??0??0000001?0?01?111?00000?1????01??000010000?0000000???0?0100?112100000000100000??0?00?0010000?0?00000???????????0?????0001010?0?000???00?01010?0010???1?0000000?1040?20200??100?000?0000???01?0010010010110?0??0?1??0100??0?2?000000001000?101?02013000011?000?????1???????201001101001001100000000000?002?0??10????????????000??30???0?10001101??0000001010100200110010{1,3}00{0,1}11000{0,1}100000000000001140111000000100000010011010100000???000?0?0000?00200100100000000000?0010001001000000041100?0000?1010000000000000000000000{0,1}000001000000110010001111000000000100
	Liolaemus_bellii				100000?00000000000?000000001100010000??00?100300??00?0?0100000001121????01000000002100011100000100?0000000??011010000??0011202000??00?0??1??00000?0001010?0?00?0??0?000000??0??100002000012?00000??000000000011000?00001101?0200?0120???00?00?000001000000??0????010?????0?0000000??000?0000000010000?0??0??01??0??0010001?0?01?131?00000?0????0000000000000?0000010???0?0100?012000000000100000??0?00?0010000?0?00000???????????2?????0001010?0?0100??00?01000?0010???1?0000000?1?30?20010??100?020?000010001?021101202001200??0?0??0?00??0?2?000000001000?000?02022010000?0000???0000?????200000101001000000400000000?011?0??11????????????000??20?????100010{0,1}00100000011111100001100{0,1}0{1,2}00110000100000000000000114011101000010000001001101000{0,1}000???000?0?0000?001001001000??0??000?0?10001101000001041001011000101{0,1}1000000000000000000000200011000000010000001111000000000100
	Liotyphlops_albirostris			100???1201????0?100111?11????001001?0??210002410??00?0?2??01?10012?0110?1??????1???????????????10000????000?2??1?1??200?0?0?1??1???30????????10???00??20???????3????1????0400?????????000?2????11??1???????1???????????1??10130000?40002?110101101111000020?10001310????00010??002002?1?0??00?000?0???01??1???0?0????0110????01?131??001000?????1??001001021?00?2?2010?011??????10010?1100????1110?0???0?0??0101?011?00000000?0?01?00??12????10???00000011??0120?0110?01?11???11?0?2??0??0???0?0000??1??????012????010000110????010?001010001??200001000?????30??000111000000011011101?01???00?0????????????????03231200310?1001410??0???11?00?11030000???0????????0??????????????????????0?????1???0???????1???????????????????1?????????????????????000?0?0000?00??100?????????????????????0?1100001121000?00?0??00?00011001???1??000?10002000200001000100?0111000100001??????
	Loxocemus_bicolor				11001??001110110000102011????00100010000000?231100000211??01010013?001001??????1???????????????10001??20000011?1?2??211?000?2??1??0200?0000030000?00??000101101200?01?001031?10???????0?0?????111101???????0020310?010?1??101301401000000011102100111100121011011010??0000110100020120?02?000?000?030?010?010411100010110??00?01131100010100??0?020001002011000?2?2010?211??????0002201000????110010?00010??01110112110010001010100000111???100?000100010102012010110001111011111011?100?0?11010100110111?1?011101?020100200?2111101011?100010?010001000?10?23000112211111010111012101?1010000001???0??01???????03232?01310?1011410?1001011110?1113000021?001??????02??????????1?????1????0?1???0???01??????1???????????????????0?????????????????????00100?0000?00??11024???????01?04?110???021001001121001101110?10?10001001???1??001001012000200001011100?0001000000010??????
	Pareas_hamptoni					11001??00011??40000100111????0000?0?10?2200?231101000302??01010011?010??1??????1???????????????10010??20000?2??1?0??212?0?0?2??1??0201??????11000?00??201?0011020??01?002021?00?????????0?????111001???????0010310?000?1??0013024010300000111021001111002210100100111012011101?0031130?22?000?000?0???000?000??11?101?110???0?0113120011010101??020001002021?00?2?2010?211??????0002201000????120010?02000??012101121000110000??100000012???101?1?0002011102012010111?01?1?01111101202?0?0?10?1010012011??0101220??1??2??????212110?1?1?200011?0?0001000????1??1000121?111000111??2101?101100000{0,1}???0??01???????03230300310?1011400??0????1?10?1??30000???001??????02??????????1?????1????1?????1???1???????1???????????????????1?????????????????????000?0?0000?00??110?????????????????????021001001121001?01110?01101001001???1??001001002000200001011100?0001000010001??????
	Pholidobolus_sp.				100101010000120100?001?00120000000000??00?113300??0000?0200000000?00?0??000001?0010100010002100111?0100000??0111?0020??0001301100??00?2??0??00010?0003100?0?00?1??0?030000??0??0?0000000011010000??000100210010000?00001111?010010110???00?00?000001101001?01??0?010?????0?0010101??102?0001000010000?0??0??02??0??000001300?11?111?00000?0????01??001010000?0001020???0?01000012100000001000000??0?00?1?11000?0?00000???????????0?????0001010?1??000??00?01000?0010???1?000000??2?40?10000??100?020?000000001?023101102001200??0?1??0100??1?2?000000000?010010?04012010000?0000???0000?????100001111002000111000100000?101?0??13????????????010??02?????100010100110000{0,1}10111002111100111011101000001000000001101120111000000100000000110010100000???000?0?0000?0010010041221110?01020?11?110010000011110010011000001100000001000000001000010003100000011010000101110000000{0,1}000
	Platysaurus_sp.					100000121?00000000?001?00100000000000??00?010300??00?0?0200000001110????0000000000?102120002100102?0010201??111000010??0001401100??00?0?????00010?0001000?0?00?0??0?020000??0??0?0000000011010000??0011102?0200200?00001101?020020130???00?00?000001101001?01??0?110?????0?0010101??100?0000000000000?0??0??03??0??1100003?0?11?131?00000?0?????1??001110000?0001020???0?01000012100010001000000??0?00??111000?0?00000???????????0?????0001010?0?000???0??11000?0010???1?0000000?2040?00010??200?000?0100??001?0111010020010?1??0?0??0100??0?2?011000010?010000?03023010000?0000???0000?????00000110??01000000010200000?101?0??11????????????000??10???1010?00?00010000001110?100011100101001001001000000000000001?201110?00001?000????110??0?0?00?1??200?101200010?00100111201100010001??1??00100100110100100110001??0000000010000000000000100000000010110010001111101100000100
	Plestiodon_fasciatus			000000?000000000000002?00120000000000??00?010200??00?0?0?20000001110????00001200010101110002100102?0110100??011000020??0001301100??00?0?????00010?0002000?0?00?0??0?020000??0??120000000011010000??0111001?0200200?00001111?0200?0130???00?00?000001101000??1??0?210?????0?0010101??100?0010020010000?0??0??02??0??010002300?11?131?00000?0?????00000100?100?0001020???0?0000?012100000001001000??0?00?0?11000?0?00000?????????????????0001010?0?0100??00?11000?0010???1?000000??2040?00010??100?000?0200??001?0011011020010?0??0?1??0110??0?2?010001010?010000?03023010000?0000???0000?????000001101001000000100200000?001?0??11????????????010??00???2010001?100110000011101102111100111011001002?010001?0000001120111010000100000000110010101000110210?202222110100100112101000011001100??001001001121001001100010?1000000010001000010000200020000100010000001000100000000000
	Pristidactylus_torquatus		100000?00000200000?000000001000010000??00?100100??00?0?0200000001120????01000000002000011000000100?0100000??011010000??0111202000??00?0??0??00000?0000010?0?00?0??0?000000??0??101002000012000000??000000000010000?00001101?020010?20???00?00?000001000000??0????010?????0?0000000??000?0000000010000?0??0??01??0??0000001?0?01?111?00000?0?????000000000000?0000010???0?0100?012100000000100000??0?00?0?10000?0?00000?????????????????0001010?0?0000??00?01000?0010???1?0000000?1?40?2000???100?020?000000001?0010011020010?0??0?0??0?00??0?2?0000000010010000?03022010000?0000???0000?????2000001010010{0,1}1000400000000?011?0??12????????????010??20?????1000100001100000111101000011000?100{0,1}10000{0,1}100000000000001140111000000100000010011010100000???200?0?0000?001001201000000?00?0?0010001001000000041000?11000101{0,1}0000000000000000000000000000000000110000001100000000000000
	Python_molurus					11001??00111?110000102011????001000102?0?00?221101000221??02010012?001011??????1???????????????10001??20001011?1?0??211?000?2??1??0201?0000030000?00??000120100201?01?002041010????0??000?2???111201???????0020310?010?1??001301401010100001112100111100120010011010??00000101?0020120?02?000?000?0???001?000411110010120???0?01131100110100??1?020001002011100?2?2020?211??????000?201000????121111?01010??011201120100110010?0101000111???100?100001010102012010111?01111011111011?100?0?21010100110111?1?011101?000100100?2111101111?100010?00??????0????23010112211111000111012101?1010000001???0??01???????03232?00310?101140011101011110?1113000021?001??????02??????????1?????1????0?1???0???0???????1???????????????????0?????????????????????00110?0000?00??11024???????01?04?11????0{0,1,2}1000001121001?01110?01100001001???1??001011012000200001011100?00010000100200?????
	Rhacodactylus_auriculatus		100000?00000000100?001?00100000000000??00?113200??0100?0?110000011?0?0??00?0?021???????????????002?0?10000??01?1?0000??0101401000??00?0?????00000?0003000?0?00?1????1?0010??0??1?00000?2????01000??1??????10020000?00001?21?020020130???00?01?000001100001?00????010?????0?0000000??000?0000000000010?0??0??03??0??0000002?1?01?131?00000?0????01??001100000?00?2?21???0?0010?012000000001001200??0?00??00??00?2?00000???????????2?????0001010?0?0010??0??01100?0010???1?000000??2?40?00000??100?020?010?00011???3101002001100????0??0100??0?2?000000100?00?000?03023000000?0000???000??????000001101101000000200200000?001?0??00????????????010??20???0?10100?1001?000001?100?021011001120001100010000001?000000114011001000010000000{0,2,3}111010000000???000?0?0000?00010110100100011010?01100??0210{0,1}1001141000?0000?000?00000001???0100000?00020000000000000000100100000010001000{0,1}
	Saltuarius_cornutus				000000020000020100?000000110000000000??00?103300??0100?0201000001110?0??00?0?021???????????????002?0210000??01?1?0000??01?1401000??00?0?????00000?0003000?0?00?1????1?0010??0??1?00120?2????00000??1???????0020000?00001?21?020040?30???00?01?000001100001?00????010?????0?0000100??000?0000000000010?0??0??03??0??0000002?1?01?131?00000?0?????1??00?100000??0?2?20???0?0010?012000000001001200??0?00???0??00?2?00000???????????2?????0001010?0?001???0??01100?0010???1?000000??2?40?00000??100??20?000?00?11???0?01002001200??0?0??0100??0?2?000000100?010000?04034010000?0000???0000?????00000{0,1}101101000000200200000?001?0??0?????????????010??20?????10{0,1}00?20{0,1}200000010110002101101??10001000010010001?0000001140110000000110000000110010000001???200?0?0000?0001011?????????1??????100??021011{0,1}{0,1}1140000??000?000?00000001???0100000100020010000000010000{0,1}{0,1}00000000100000001
	Takydromus_sexlineatus			100000010000000000?002?00121000000000??00?010100??00?0?0?10000001400????2????2?0?0?1001100001?0112?0000000??111000000??0001301100??00?0?????00010?0002000?0?00?0??0?030000??0??010002000011010000??0001001?0000100?00001101?010020130???00?00?000001101000??1??1?210?????0?0000101??102?0000000000000?0??0??02??0??0100003?0?01?121?00000?0?????000001010000?0000020???0?0100?012100000001000000??0?00?0?11000?0?00000???????????0?????0001010?0?000???00?01000?0010???1?000000??2040?00000??100?000?020000101?011101102001200??0?0??0?00??0?2?000000000?00?000?04023010000?0000???0000?????100001101102000000300200000??01????11????????????010??20???0?100010{0,1}00{1,2}0000001110010211110011101110100{0,1}00000000000000112011{0,1}0{0,1}000010000000{0,1}110010100000???110?1010000001001003123011000102011010000100111110100100110011??0000000000000000000000000011000000111010001011100000000001
	Teius_teyou						100000?00000000100?000000100000010000??00?100000??00?0?0300000002110????00101000000100020001101110?0003000??0111?0001??0001401100??00?0?????00000?0002010?0?00?0??0?000000??0??010002000002?10000??0000000?0000000?00001111?010010120???00?00?000001101000??1??0?010?????0?0110101??102?0000000020100?0??0??02??0??0000003?0?01?101?10000?0?????010011110000?0001020???0?01001112100000001000000??0?00?1?10000?0?00000???????????0?????0001110?0?001???00?01010?0010???1?000100??1040?00001??000?000?030000101?021001102001200??0?1??0000??1?2?000000000?10?000?02012010000?000????0000?????100001111001000101000200000?011?0??13????????????000??02???0?100010100100000011110102101100101000111000{0,1}000000{0,1}000110113011100000010000000111{0,1}010100?00???100?0?0000?001001004020101000103011011100100100110100101100000111000000010000000010000000000000000110110001111000000000000
	Tiliqua_scincoides				000100?00000000000?000?00120000000000??00?110100??00?0?0300000001110????2??0?2?0?1?1011100021?0102?0010000??011000020??0001401100??00?0?????10010?0003200?0?00?0??0?1?0000??0??0?0000000101010000??011100210200200?00101111?020020120???00?01?000001101000??1??0?210?????0?0210101??100?0000020020000?0??0??22??0??010003310?11?101?10000?0????01??01100?100?00?2020???0?0000?012100000001000000??0?00?0?11000?0?00000???????????1?????0001010?1?0010??00?11002?0010???1?000000??2?0??10020??200?020?0000??001?0021011010010?0??0?1??0100??0?2?000001000?010000?03012010000?0000???0000?????000001101001000000300310000?201?0??11????????????010??00?????10000?10111000011110010{1,2}11110011{1,2}011{0,1}01002?010000?0000001140111012000{0,1}0000000?110010101200110200?20222211010010011200100001100110?001010000011110010011000001100000001?000200010000200020000100010000001000000000000000
	Trachylepis_quinquetaeniata		000000?00000000000?002?00100000000000??00?110100??00?0?0200000001110????2??0?2?0?1?1011100021?0102?0110100??011000020??0001301100??00?0?????00010?0003000?0?00?0??0?020000??0??0?0000000001010000??0111002?0200200?00001111?0200?0120???00?00?000001101000??1????210?????0?0210101??100?0000020010000?0??0??12??0??010003310?11?131?00000?0?????1??00100?100?00?2?20???0?0100?012100000001000000??0?00?0111000?0?00000???????????0?????0001010?0?000???00?11002?0010???1?000100??2?40?00010??100?020?0100??001?0020011020010?0??0?1??0110??0?2?010001010?00?000?03023010000?0000???0000?????000001101101000000300200000?101?0??11????????????010??00???2010000?101100000111100102111100111011001002?01000000000?011401110?000010000000111001110?000110200?2022221101001001120010000110011?0??00100000112100100110001??1000000011001000010000200021100100010000001010000000000000
	Tropidophis_haetianus			11001??00111?130010102011????0010?0?1102200?231100000222??02010011?011011??????1???????????????10011??2000002??1?0??212?000?2??1??0201?0001011000?00??000100100201?01?001041211????0??000?2???111101???????00103100010?1??001301401020000001102100111100120010111310??00000101?0020020?12?000?000?031?010?000411110010100???0?01131100110100??0?020001001011100?2?2010?101??????0002201000????121010?01000??011201121100100000??100000012???110?100002010102012110111001111011110011?2?0?0?01?10100120111?01012101?02?2??????21211001?1?210011?010001?00????13000002311111000111112101?101000000{0,1}???0??01???????03231?00310?1111400??011011110?1103000021?001??????02??????????1?????1????0?1???0???0???????1???????????????????0?????????????????????000?0?0000?00??11024???????01?04?1101??1210?0001121001?01110?10?01001001???1??001001012000200001011100?0001000010021??????
	Tupinambis_teguixin				100000?000000000000001?00111000010000??00?110000??00?0?0200000002410????01?01000002100020001101110?1200000??0111?0001??0001401100??00?0?????00000?0003000?0?00?0??0?000000??0??010002000012?10000??000100110000000?00001111?010010100???00?01?000001101000??1??0?010?????0?0010101??102?0010000000100?0??0??02??0??0000003?0?01?101?10000?0?????1??011110000?0001020???0?00001112100000001000000??0?00?1?10000?0?00000???????????0?????0001110?0?000???01?01011?0010???1?000010??1040?00000??100?000?030000001?011001102001200??0?1??0100??1?2?000000000?110010?04022210000?0000???0000?????2000022110011??111000100000?011?0??13????????????000??02???0?10000?10010000001011{0,1}001111100{0,1}0{1,2}0{0,1}011100010000000000{0,1}10114011100000010000000?110010?00000???200?0?0000?0010010041201110001020110111001001011101001001{0,1}0000011000000010000000010000000000000000110110001111100000001000
	Typhlops_jamaicensis			1000??1201????01001101011????00000010??130002410??00?0?2??100?0012?0?10?1??????1???????????????10000???0?00?11?1?1??200?0?0????1???10?????????????00?2000100?002????1??0?1?????????????????????????1???????1???????????1??101300401400020111101102111000?20?1?00011?????00010??002002?1?0??0??000????101?????40??????0110?????1?1310??01000?????1??1??????????0??????????1??????001000?000????1211?1???010??0101?011?00010000?0?010000012???110???0001001102013??1110?01?11???11?0140?0??1???0?0?01?000?0?1?012000?010010110????010?001110001??100001000?????30??00001?000000011011001?0????00?0020?0??01???????03231?00310?1011410??0???1???0?1??30000???001??????02??????????1?????1????1?????0???1???????1???????????????????1?????????????????????000?0?0000?00??110????????????????1?1??021100001?11010?00?0???0?00011011???1??000?10002000200001000100?0111000000001??????
	Uma_scoparia					1000000{1,2}0000000000?000000001100011000???0?100000??00?0?0000000001121????1??????0?021000111000?0100?0000000??011010000??0111202000??00?1??0??00000?0000010?0?00?0??0?1?0000??0??1?0012000012000000??000000000100100?00001101?020010110???00?00?000001000000??0????010?????0?0000000??000?0000000000000?0??0??01??0??0010001?0?01?121?00000?0????01??000000000?0000010???0?01000012100000000100000??0?00?0010000?0?00000???????????0?????0001010?0?000???01?01000?0010???1?000000??1?40?10000??100?020?000010001?001101202021100??0?0??0000??0?2?000000001100?000?02023010000?000000?0000?????200000101001011000401000000?001?0??11????????????000??20???101000101001000001111011000011000?0000100000100000000000001140111000000000000012011010000000???000?0?0000?00200100100000000000?0010?00001000000041000?1100010101000000000000100010001000000000000110010000111001000000100
	Uromastyx_aegyptia				1020000{2,3}0000200?00?000110??1100010000??00?1?0000??00?0?0300000001120????1??????0?020000?10020?0100?0200000??011010000??020120?000??00?0??2??00010?000?010?0?00?0??1?1?0000??0??1?0101000102000000??000000000000000?00001101?0200?0120???00?00?000001010001?00????010?????0?0010000??000?0000000001000?0??0??21??0??0000003?0?01?111?00000?1????01??000010000?0000010???0?0000?012100000000100000??0?00?0010000?0?00000???????????0?????0001010?0?0100??01?01011?0010???1?0000000?0040?20210??100?000?0000???01?0012010010110?0??0?0??0?00??0?2?000000000000?00??01012000011?000?????1???????001001101001000000000000000?002?0??10????????????000??30???0?100011010?0000001011100000110010000110000{0,1}000000{0,1}1000000114011100000010000001201101{0,1}100000???000?0?0000?0020010????????????????100??001000000031000?1000000100000000000000000010000000100000000110010000111000000000100
	Varanus_exanthematicus			11000002000011000000?21101?1100010000??00?0?2200??0000?0300000002120?0??20?0?0?0??01000100?2??0101?0000000??011000000??0001?001011?00?0??00?00001?000100000?00?0??0?010200??2??1200120010?2?00000??0101002?0000000?000011110010020120???00?00?000001111001101??0?010?????0?0011021??103?0000000001020?0??0??020?0??0100001?1?01?131?00000?0?????1??001110000?01010200??0000001012100000001000000??0001?0111000?0?00010????????0??0???000001010?0?1100??00?01013?0010?0?100100110?0041?0000??0000010100210001011011201002001110??0?0?00?00??002?010001000?11000002301201000001101010001??0???000002100?111??110?00300002?2131100100000000000000000?300003120000?2000000000101111000100000?2000010011000000000000?011401110?000010000?00?11001110?300???110?0?0100?001001024??????001?04?110110001001000040000?0000?000000000000000000000010?1001000000000010000002001000000001000
	Varanus_salvator				11000101000011000000121101?1100010000??00?0?2200??0000?0?10000002120?0??2??0?0?0??01000100?2??0100?0200000??011000000??0001?031011?00?0??00?00001?000110000?00?0??0?010200??2??1200020010?2?00000??0101002?0000000?000011110010030120???00?00?000001111000??1??0?010?????0?0011021??103?0000000001020?0??0??020?0??0100001?1?01?131?00000?0?????1??001110000?01010200??0000001012100000001000000??0001?0011000?0?00010????????0??0???000001011?0?1100?000?01013?0010???100100110?0041?0000??00000101001101010110112010020011100?0?0?00?00??002?010001000?11002002301211000001111110001??0???000002100?111??110410300002?2131100100000000000000000?300003120000?21??0000001011110000?0000?2000010011000000000000?011401110?000010000?00?110010?0?0000?0110?1011110001?00024???????01?04?110???001001000041000?1100000001000000000000000001001001001000000111001002011000000001000
	Xenodermus_javanicus			11101??00111??30010101111????0010?0??3?2200?2?1100000301??01010012?011011??????1???????????????10011??20000?2??1?0??212?000?2??1??0201?0????31000?00??00110010020??01?002041011????0??000?2???111001???????00203111010?1??0013014010200000111021001110002200100110110001011101?0021130?02?00{0,1}?000?0???001?00041?11001???????0?0113120011010110??021001002021100?2?2010?211??????0002201000????121111?01000??01010111000010000???10?000012???101?1?0102011102012110111?01?11011110011?2?0?0?01?1010012011??01012101?0??2??????1121101111?200012?010001000????20000002311111000111112101?10100000001000??01???????03220200311?1111400??0??0?1?10?1??3000021?001??????02??????????1?????1????1?????1???1???????1???????????????????1?????????????????????000?0?0000?00??11024??????001?04?11?1??021000001100100?0000??00?00001001???1??001001002001200100011100?0001010010021??????
	Zonosaurus_ornatus				100000010000000100?001000120000000000??00?000300??00?0?0?30000001110????010000?000?102110001100102?0110202??111000010??0001401100??00?0??0??00010?0001000?0?00?0??0?020000??0??020000000011010000??001110210200200?00001101?020010130???00?01?000001101000??1??0?210?????0?0010101??100?0010000010000?0??0??02??0??0100003?0?11?131?00000?0????0000001110000?0001020???0?0000?012100010001000000??0?00?0?11000?0?00010???????????0?????0001010?0?000???01?11000?0010???1?000000??2040?00010??100?000?020000001?012001002001101??0?1??0100??0?2?010001010?010000?03022010000?0000???0000?????100001101001{0,1}?0000000300000?001?0??11????????????010??10???1010000?101100000011100102111100111011101001101000000000001130111002000100000001110010100000100?10?1?2212010100100112201100010001101??001001111111001001100010?0100000010000200000000200011100010110110001011100000000000
;

END;

BEGIN ASSUMPTIONS;
	OPTIONS DEFTYPE=unord;
	TYPESET *OrderedChars  = ord: 3 8 13 15 22 29 36-37 45-46 54 57 58 60 65 67 77-79 92 98 100 104 106 109 110 113 114 116 119 121 124 141 148 150-152 155 157 168-169 171 173 181 184 187 202 205 206 218 222 224-225 228-229 232 249-250 258 264 273-274 277 280 289 296 312 314 322 324 338 341 345 347-348 353 355 360 373-376 379 382 384 387 389 391 394 399 406 418 425 430 435 438 440 444 447 449 453 465-466 468 471 475-476 478 483 485 487 495-498 502-504 506 508 510 512 521 526 528 540-541 545-546 548-549 563 574 579 593-599 603 609 632 634 640 643 644-645 675 692 724 727 740 744-746 749 758 767 775 809 812 832 840;
END;
